# Supplementary material
Source: PubMed Central journal article supplement (PMC4169698)
Supplement: NIHMS599769-supplement-1.pdf [file NIHMS599769-supplement-1.pdf]

## Supplementary Information

### Chemically Defined and Small Molecule-Based Generation of Human Cardiomyocytes

Paul W. Burridge<sup>1-3</sup>, Elena Matsa<sup>1-3</sup>, Praveen Shukla<sup>1-3</sup>, Ziliang C. Lin<sup>4</sup>, Jared M. Churko<sup>1-3</sup>, Antje D. Ebert<sup>1-3</sup>, Feng Lan<sup>1-3</sup>, Sebastian Diecke<sup>1-3</sup>, Bruno Huber<sup>1-3</sup>, Nicholas M. Mordwinkin<sup>1-3</sup>, Jordan R. Plews<sup>1-3</sup>, Oscar J. Abilez<sup>1-3</sup>, Bianxiao Cui<sup>5</sup>, Joseph D. Gold<sup>1</sup>, & Joseph C. Wu<sup>1-3</sup>

<sup>1</sup>Stanford Cardiovascular Institute, <sup>2</sup>Institute for Stem Cell Biology and Regenerative Medicine, <sup>3</sup>Department of Medicine, Division of Cardiology, <sup>4</sup>Department of Applied Physics, <sup>5</sup>Department of Chemistry, Stanford University School of Medicine, Stanford, California, USA

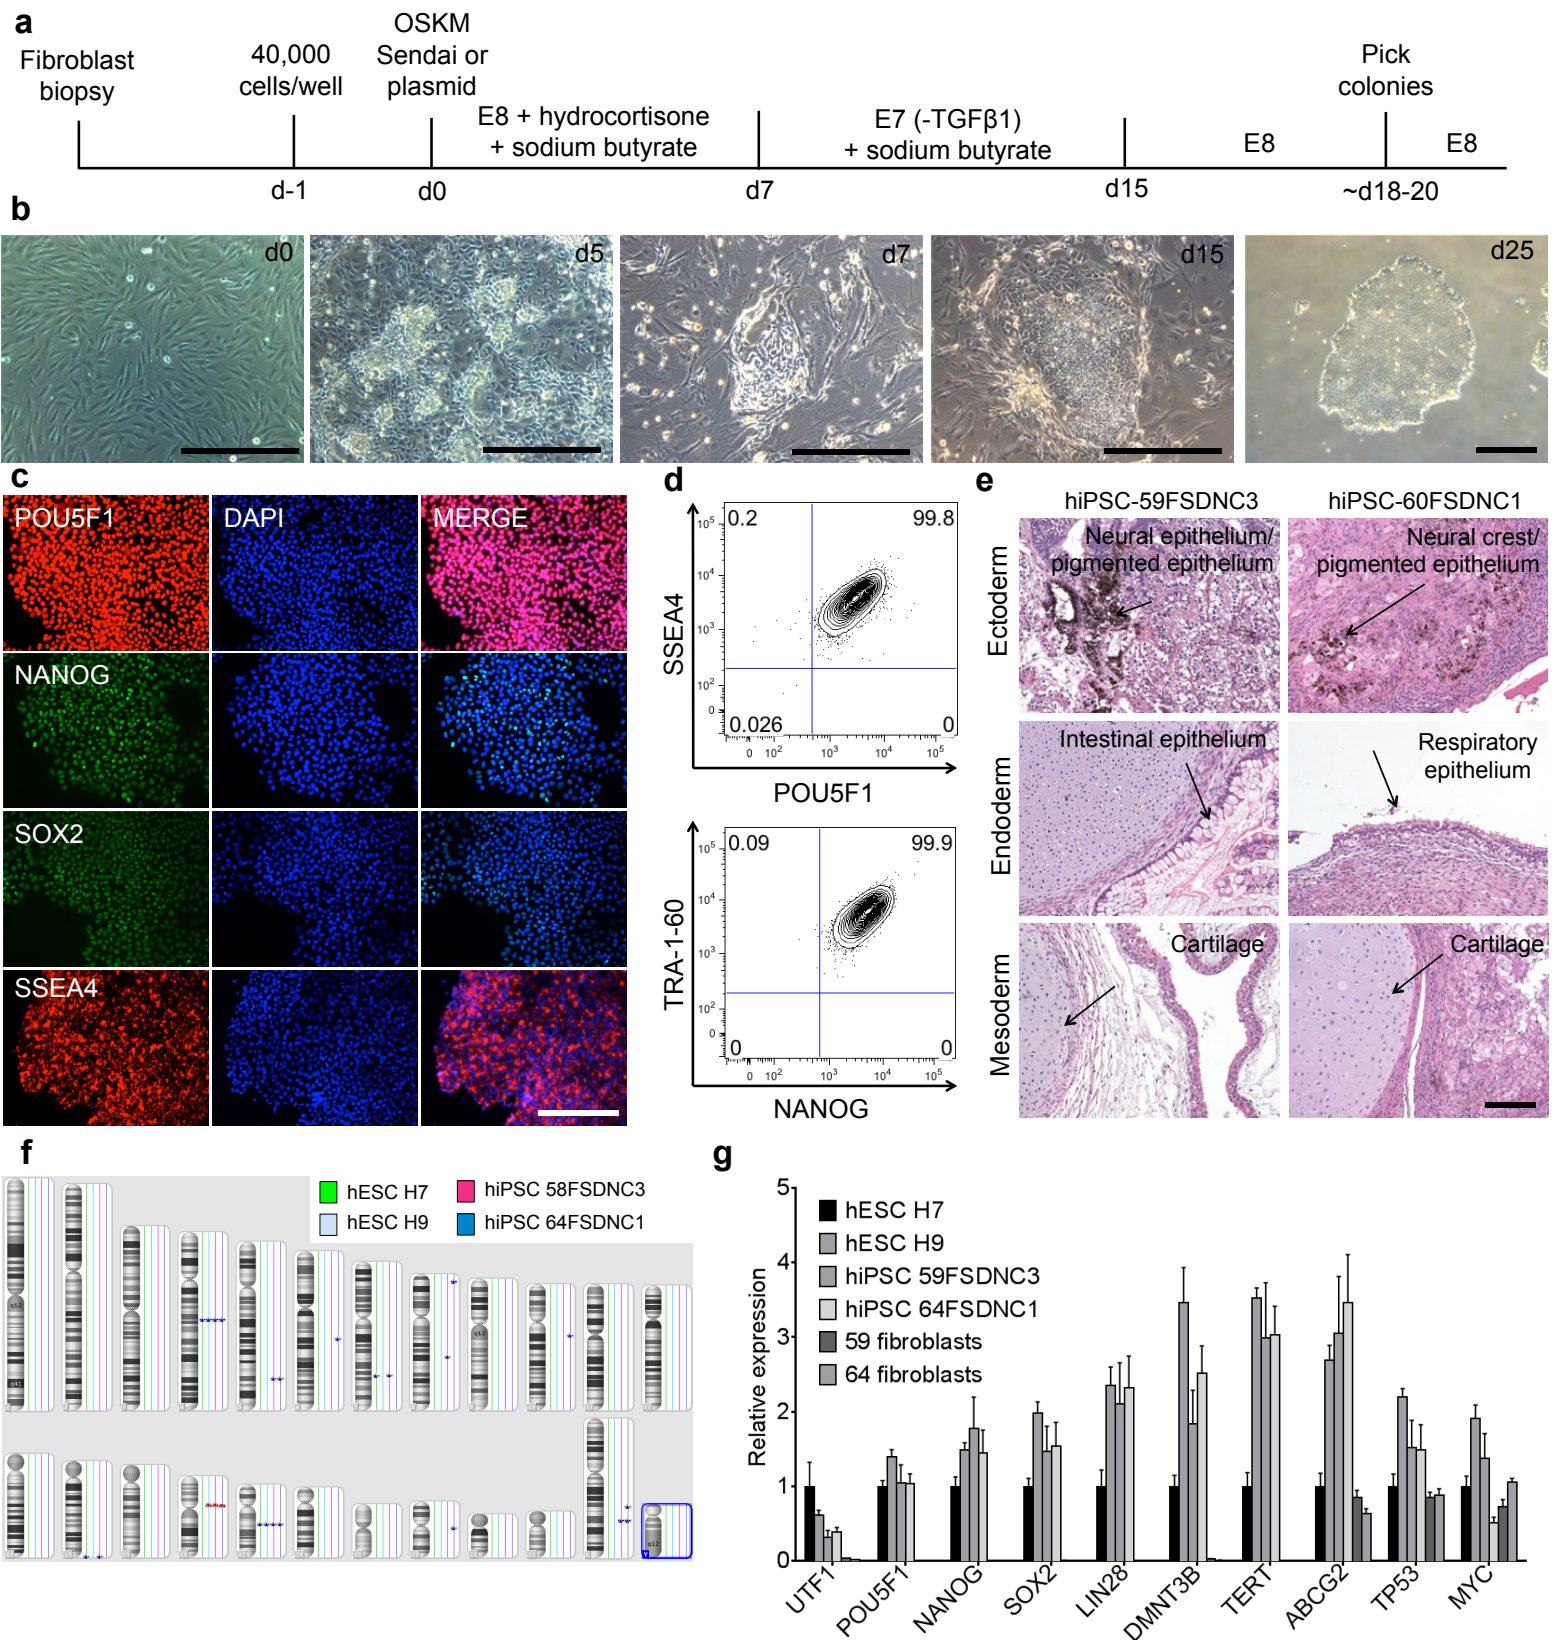

**Supplementary Figure 1** | Generation of hiPSCs using a chemically defined, synthetic matrix, integration-free methodology. **a)** Timeline of strategy for chemically defined fibroblast reprogramming and phase contrast images of cells during reprogramming. Eleven cell lines were made using this strategy from fibroblasts or peripheral blood mononuclear cells, reprogrammed with either Sendai virus (*POU5F1* [*OCT4*], *SOX2*, *KLF4*, *MYC*), episomal plasmids (*OCT4*, *SOX2*, *KLF4*, *MYC*, *LIN28*, short hairpin p53), or a single ~9kb codon optimized mini-intronic plasmid (*OCT4*, *SOX2*, *KLF4*, *MYC*). Scale bar, 50  $\mu$ m. **b)** Phase contrast images of fibroblasts during reprogramming (cell line 59FSDNC3 shown as an example). **c)** Immunofluorescence staining for pluripotency marker expression. Scale bar, 12.5  $\mu$ m. **d)** Flow cytometry assessment of pluripotency markers. **e)** Teratoma assay demonstrating cell types from all three germ layer lineages. Scale bar, 50  $\mu$ m. **f)** SNP karyotype of hESC (H7 and H9) and hiPSC (59FSDNC3 and 60FSDNC1) lines demonstrating normal karyotype of hiPSC after reprogramming. **g)** Real time RT-PCR assessment of genes associated with pluripotency in hiPSC lines (59FSDNC3 and 64FSDNC1), and fibroblasts they were derived from, relative to H7 hESC. Error bars represent S.D. from experimental quadruplicates.

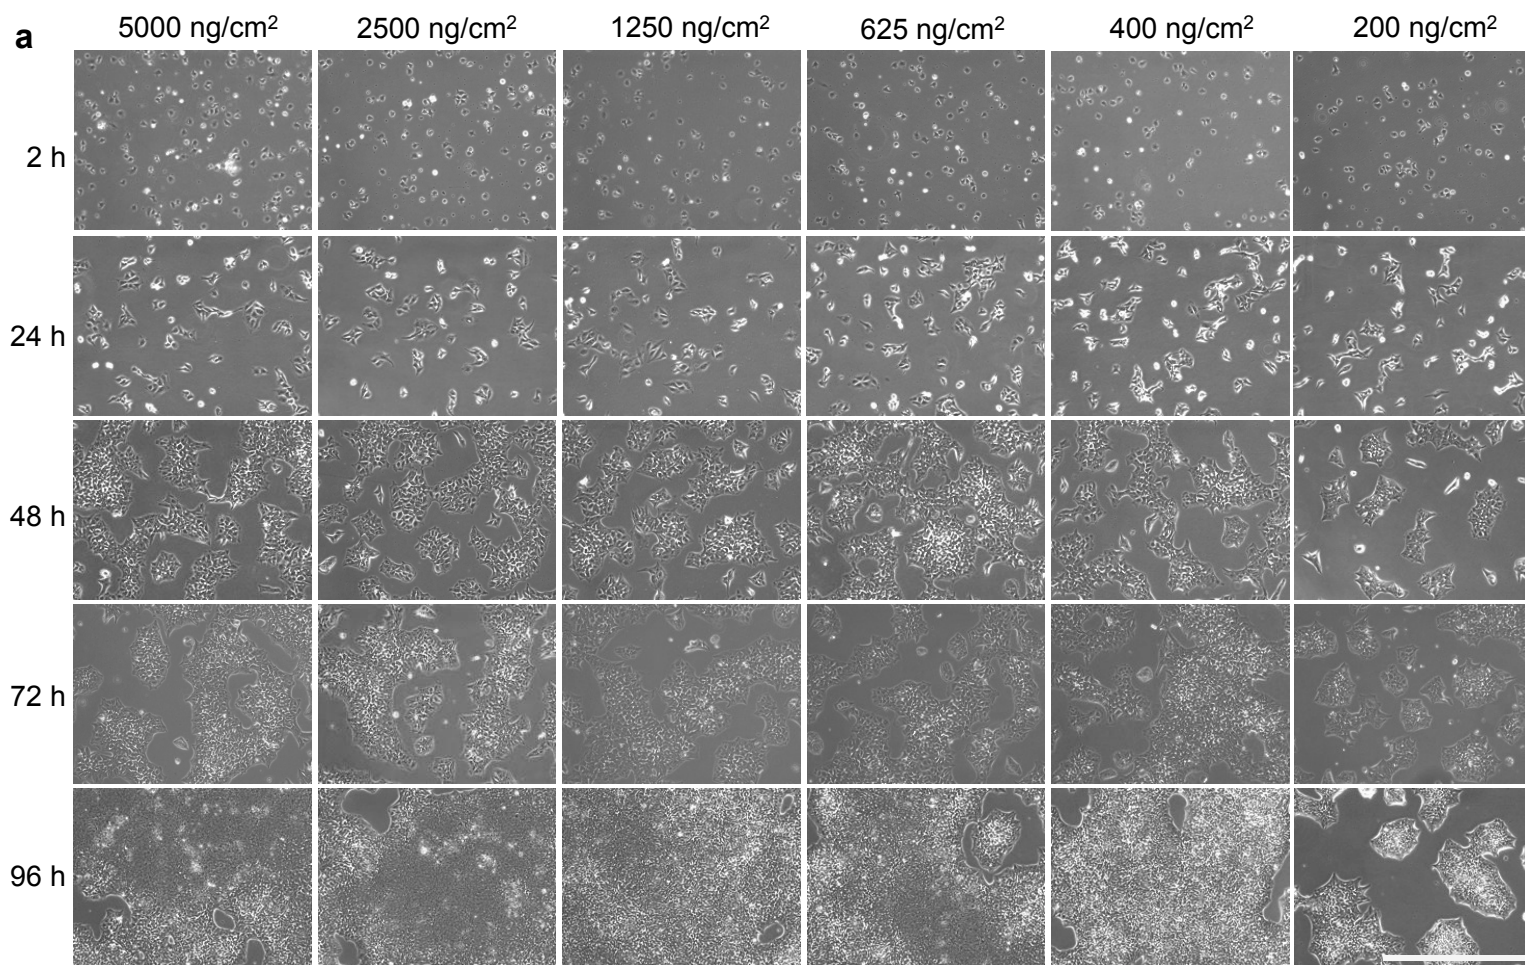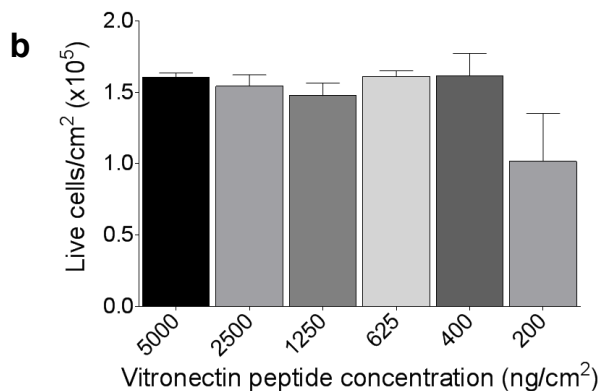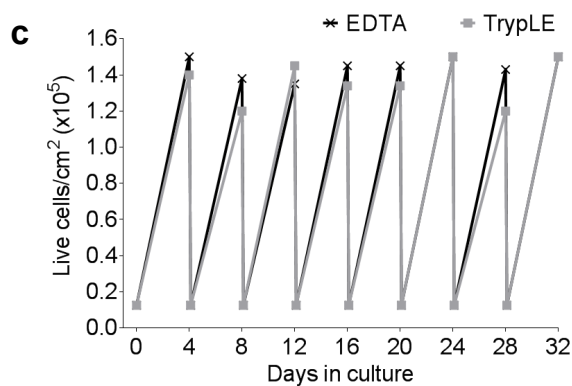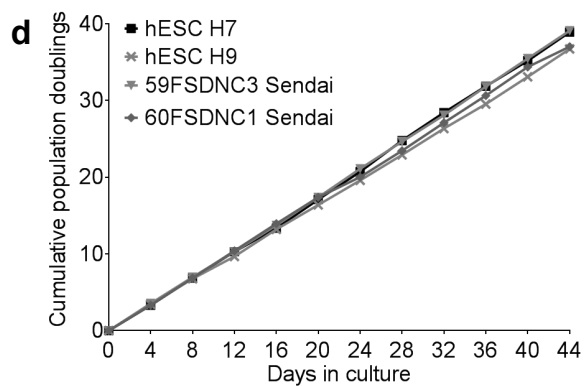

**Supplementary Figure 2 | Growth of hiPSCs in chemically defined medium on a synthetic vitronectin peptide matrix. a)** Phase contrast images of hiPSC line 59FSDNC3 grown on increasingly lower concentrations of vitronectin peptide. A concentration of 625 ng/cm<sup>2</sup> was used for subsequent studies. Scale bar, 100  $\mu$ m. **b)** Cell yields after seeding on vitronectin peptide at  $1.25 \times 10^4$  cells/cm and 96 h of growth,  $n = 3$ . Error bars represent S.E.M. Cost of vitronectin peptide at a concentration of 625 ng/cm<sup>2</sup> were equivalent to standard costs of Matrigel. **c)** Comparison of EDTA and TrypLE for passage on reproducibility of growth rate, cells were split 1:12 for EDTA or counted and plated at  $1.25 \times 10^4$  cells/cm<sup>2</sup> for TrypLE. **d)** Cumulative population doublings of two hESC lines (H7 and H9) and two hiPSC lines (59FSDNC3 and 64FSDNC1) grown in E8 medium on vitronectin peptide.

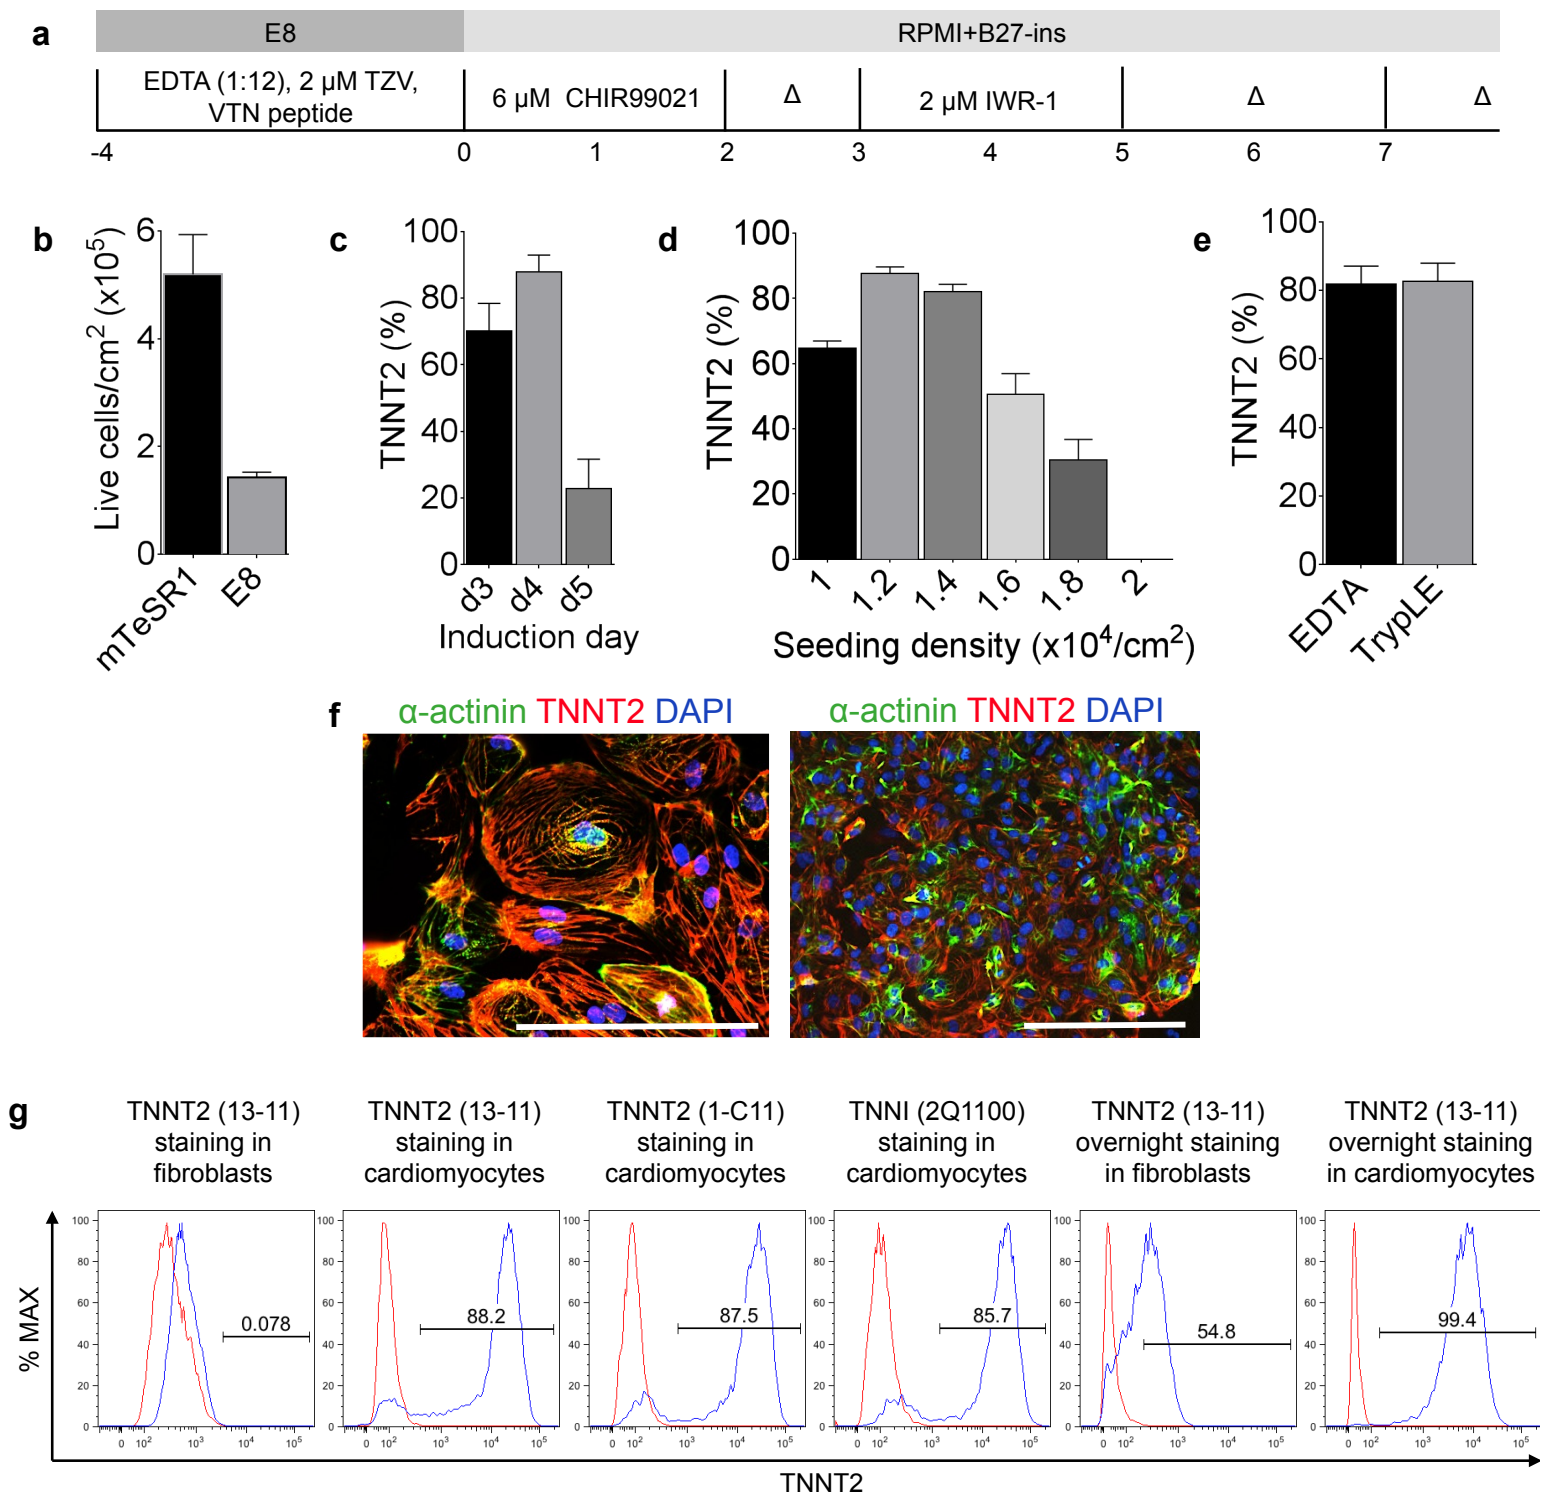

**Supplementary Figure 3 |** Modification of existing RPMI+B27-ins small molecule-based differentiation methodology for pluripotent cells cultured under chemically defined conditions. **a)** Schematic of modified differentiation protocol. **b)** Yield of live cells after 96 h culture in either mTeSR1 or E8. mTeSR1 cells were seeded at  $1.25 \times 10^5$  cells per cm<sup>2</sup> and E8 cells at  $1.25 \times 10^4$  cells per cm<sup>2</sup>,  $n = 3$ . **c)** Optimization of number of day after passage for highest efficiency cardiac differentiation measured by percentage TNNT2 positive cells assessed by flow cytometry,  $n = 3$ . **d)** Optimization of seeding density for subsequent differentiation efficacy,  $n = 3$ . **e)** Effect of clump (EDTA) or single cell (TrypLE) passaging method on subsequent differentiation efficiency. **f)** Immunofluorescence images of cells produced by E8/EDTA/RPMI+B27-ins methodology. Scale bar, 25  $\mu$ m. **g)** Optimization of cardiac troponin T (TNNT2) flow cytometry staining, to test the specificity of our staining protocol, we stained fibroblasts (45 min primary) with the TNNT2 antibody 13-11 and demonstrated a very minor increase in staining (blue) over the isotype control (red). We also assessed additional monoclonal antibodies for cardiac troponin T (1-C11) and cardiac troponin I (7E147), each from a different manufacturer, and found similar levels of positive cell detection (~85-88%). As part of our optimization, we also assessed overnight primary antibody staining with the TNNT2 13-11 antibody and found that this method gave us significant non-specific staining in fibroblasts and raised the percentage of TNNT2+ cells to >99%. Therefore we adhered to 45 min staining as above.

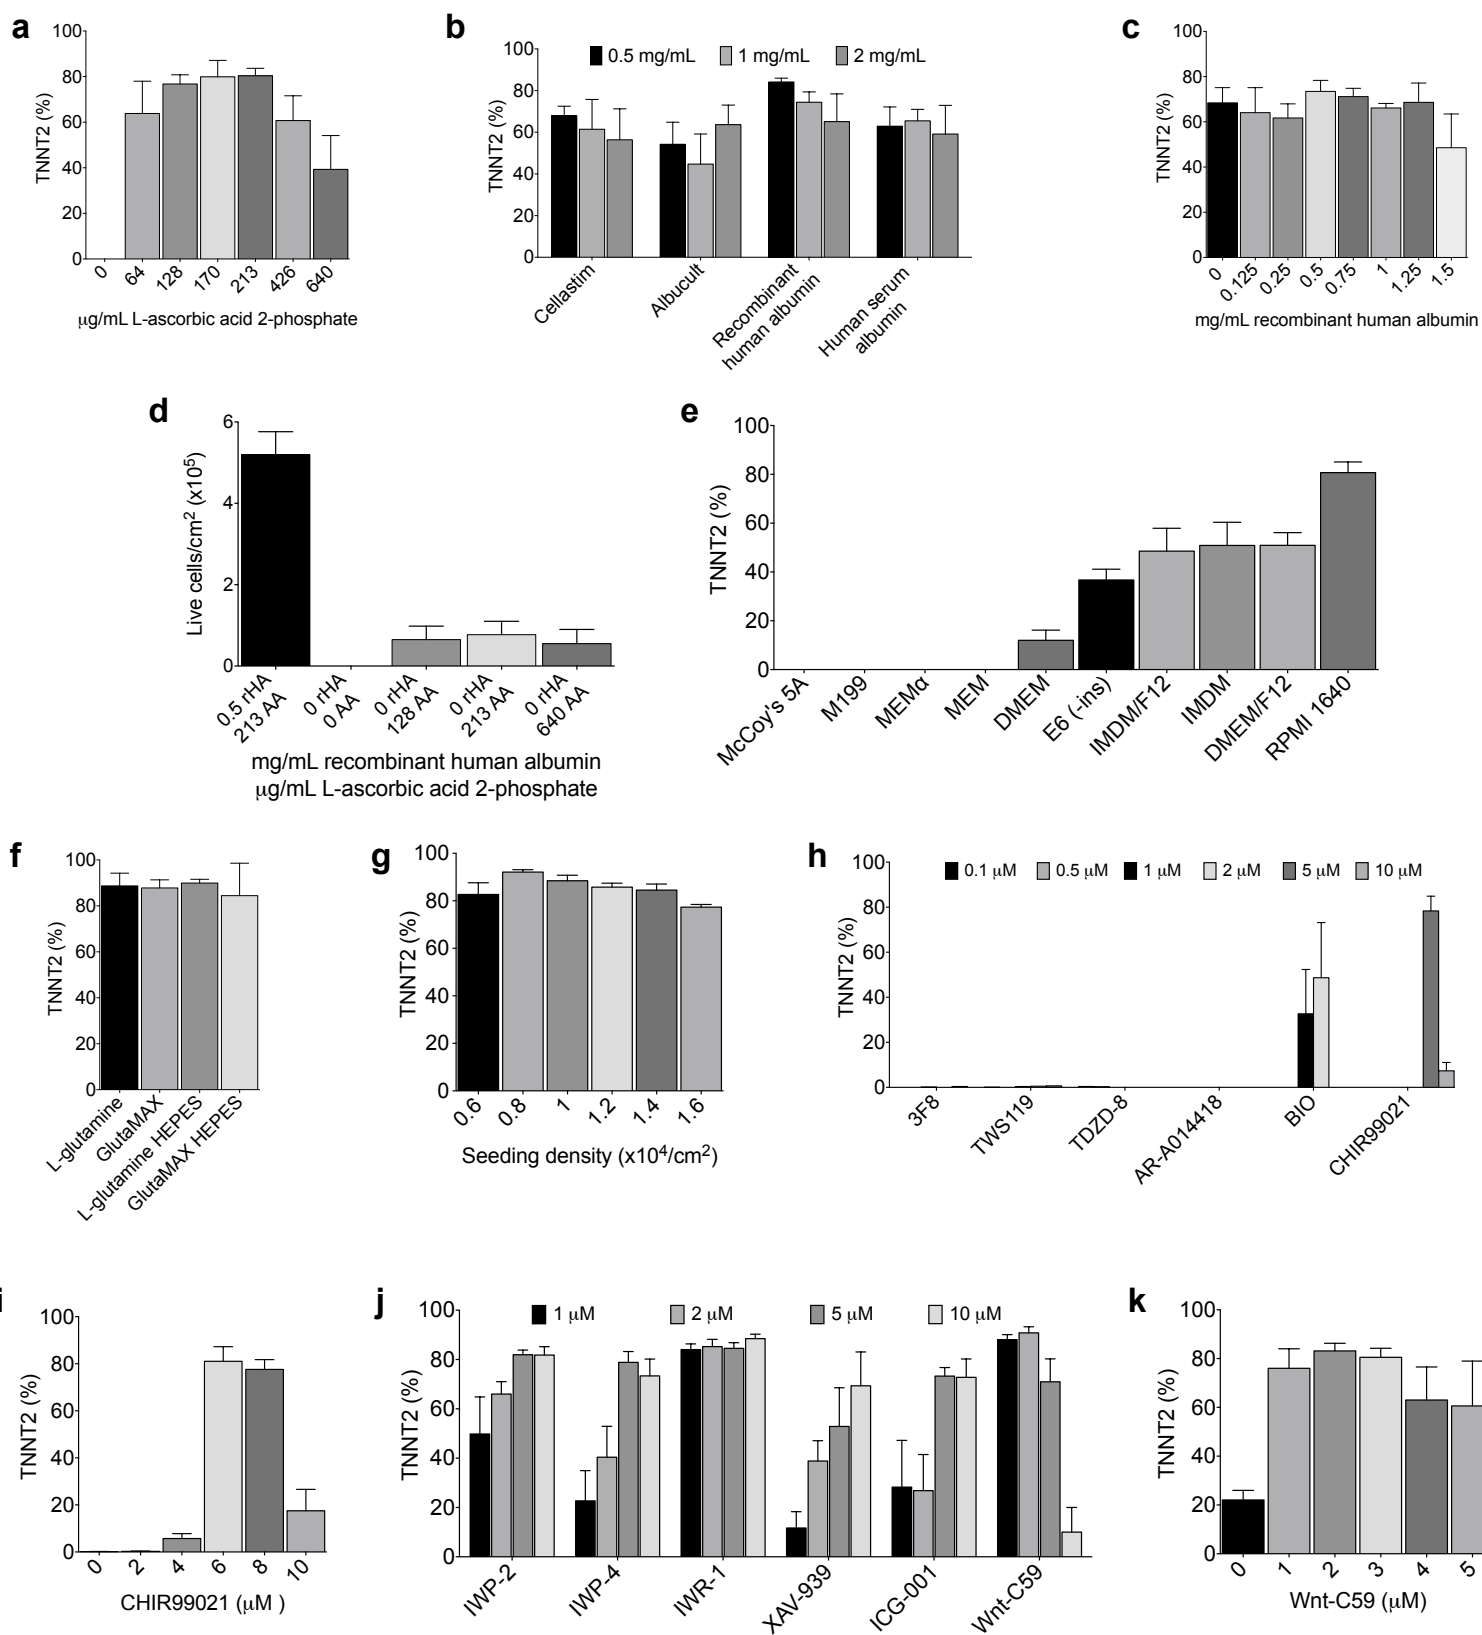

**Supplementary Figure 4 | Optimization of chemically defined differentiation media and small molecules. a)** Optimal dose of L-ascorbic acid 2-phosphate,  $n = 7$ . **b)** Optimization of recombinant human albumin supplier,  $n = 3$ . **c)** Optimization of rHA dose, qualitatively 500  $\mu\text{g/mL}$  rHA produced the most suitable contracting monolayers whereas 750  $\mu\text{g/mL}$  and above were more likely to result in the formation of three-dimensional structures,  $n = 7$ . **d)** Assessment of elimination of recombinant human albumin on cardiomyocyte yield when varying doses of L-ascorbic acid 2-phosphate. Replacement of rHA with polyvinyl alcohol (PVA), which prevents shear stress in a similar manner to rHA, combined with varying doses of AA 2-P did not increase differentiation yield. **e)** Optimization of basal media,  $n = 3$ . **f)** Assessment of different RPMI 1640 media variants,  $n = 3$ . **g)** Optimization of pluripotent cell seeding density,  $n = 3$ . **h)** Optimization of GSK3 $\beta$  inhibitor; only BIO and CHIR99021 did not cause total cell death,  $n = 3$ . **i)** Optimization of CHIR99021 dose,  $n = 4$ . **j)** Optimization of Wnt inhibitor dose,  $n = 3$ . **k)** Optimization of Wnt-C59 dose,  $n = 4$ .

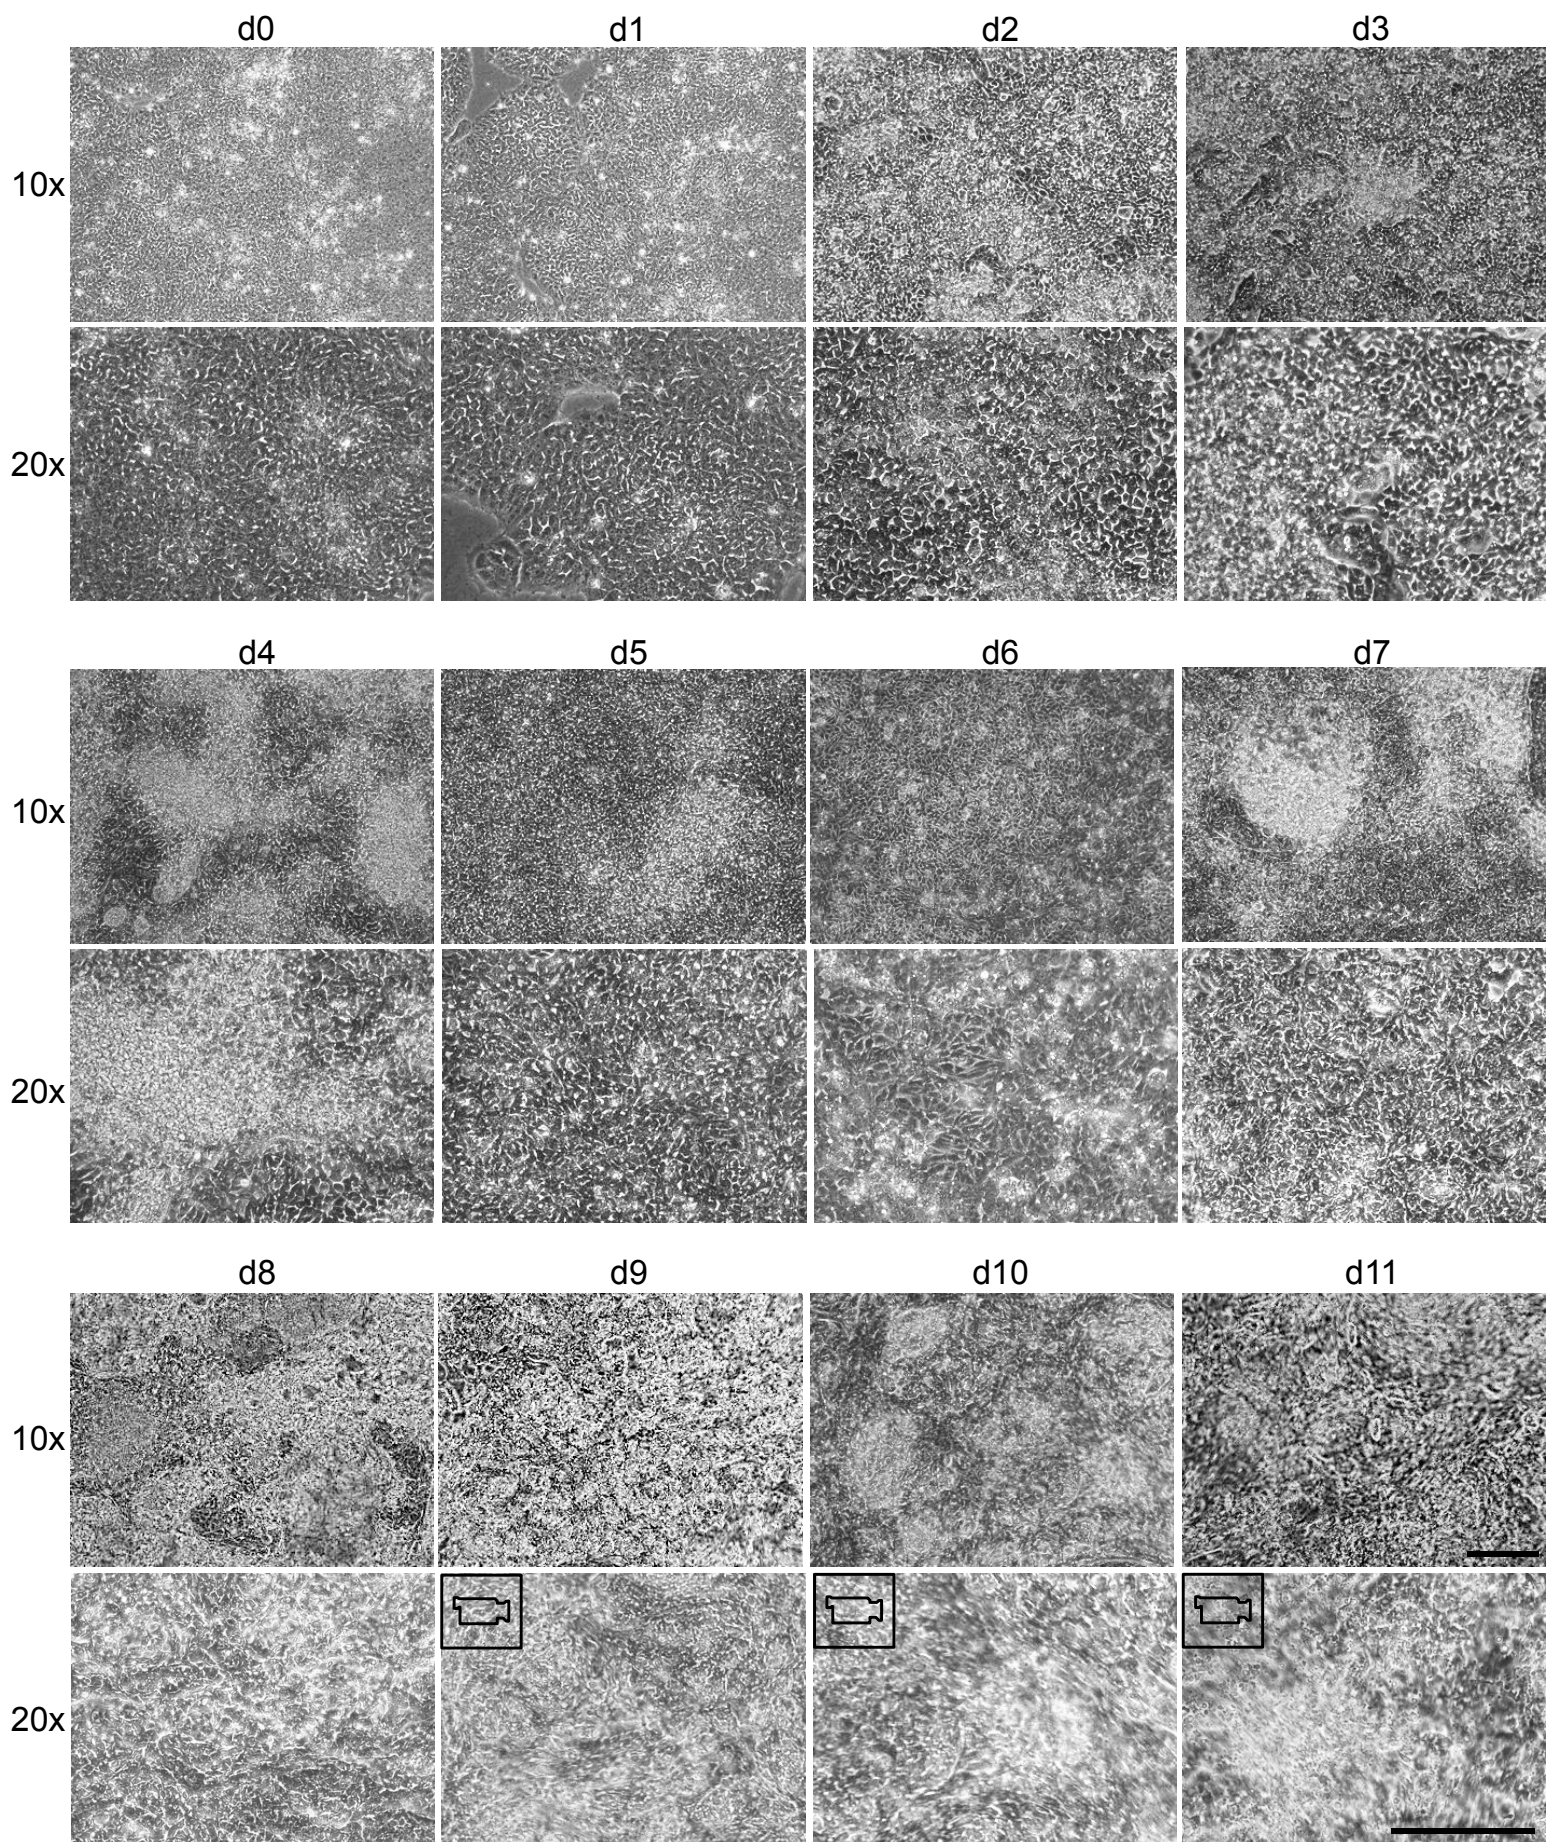

**Supplementary Figure 5** | Phase contrast images of hiPSC during chemically defined differentiation. These images demonstrate minimal cell death. Videos of day 9, day 10, and day 11 are provided in Supplementary Videos 1, 2, and 3, respectively. Scale bar, 25  $\mu$ M.

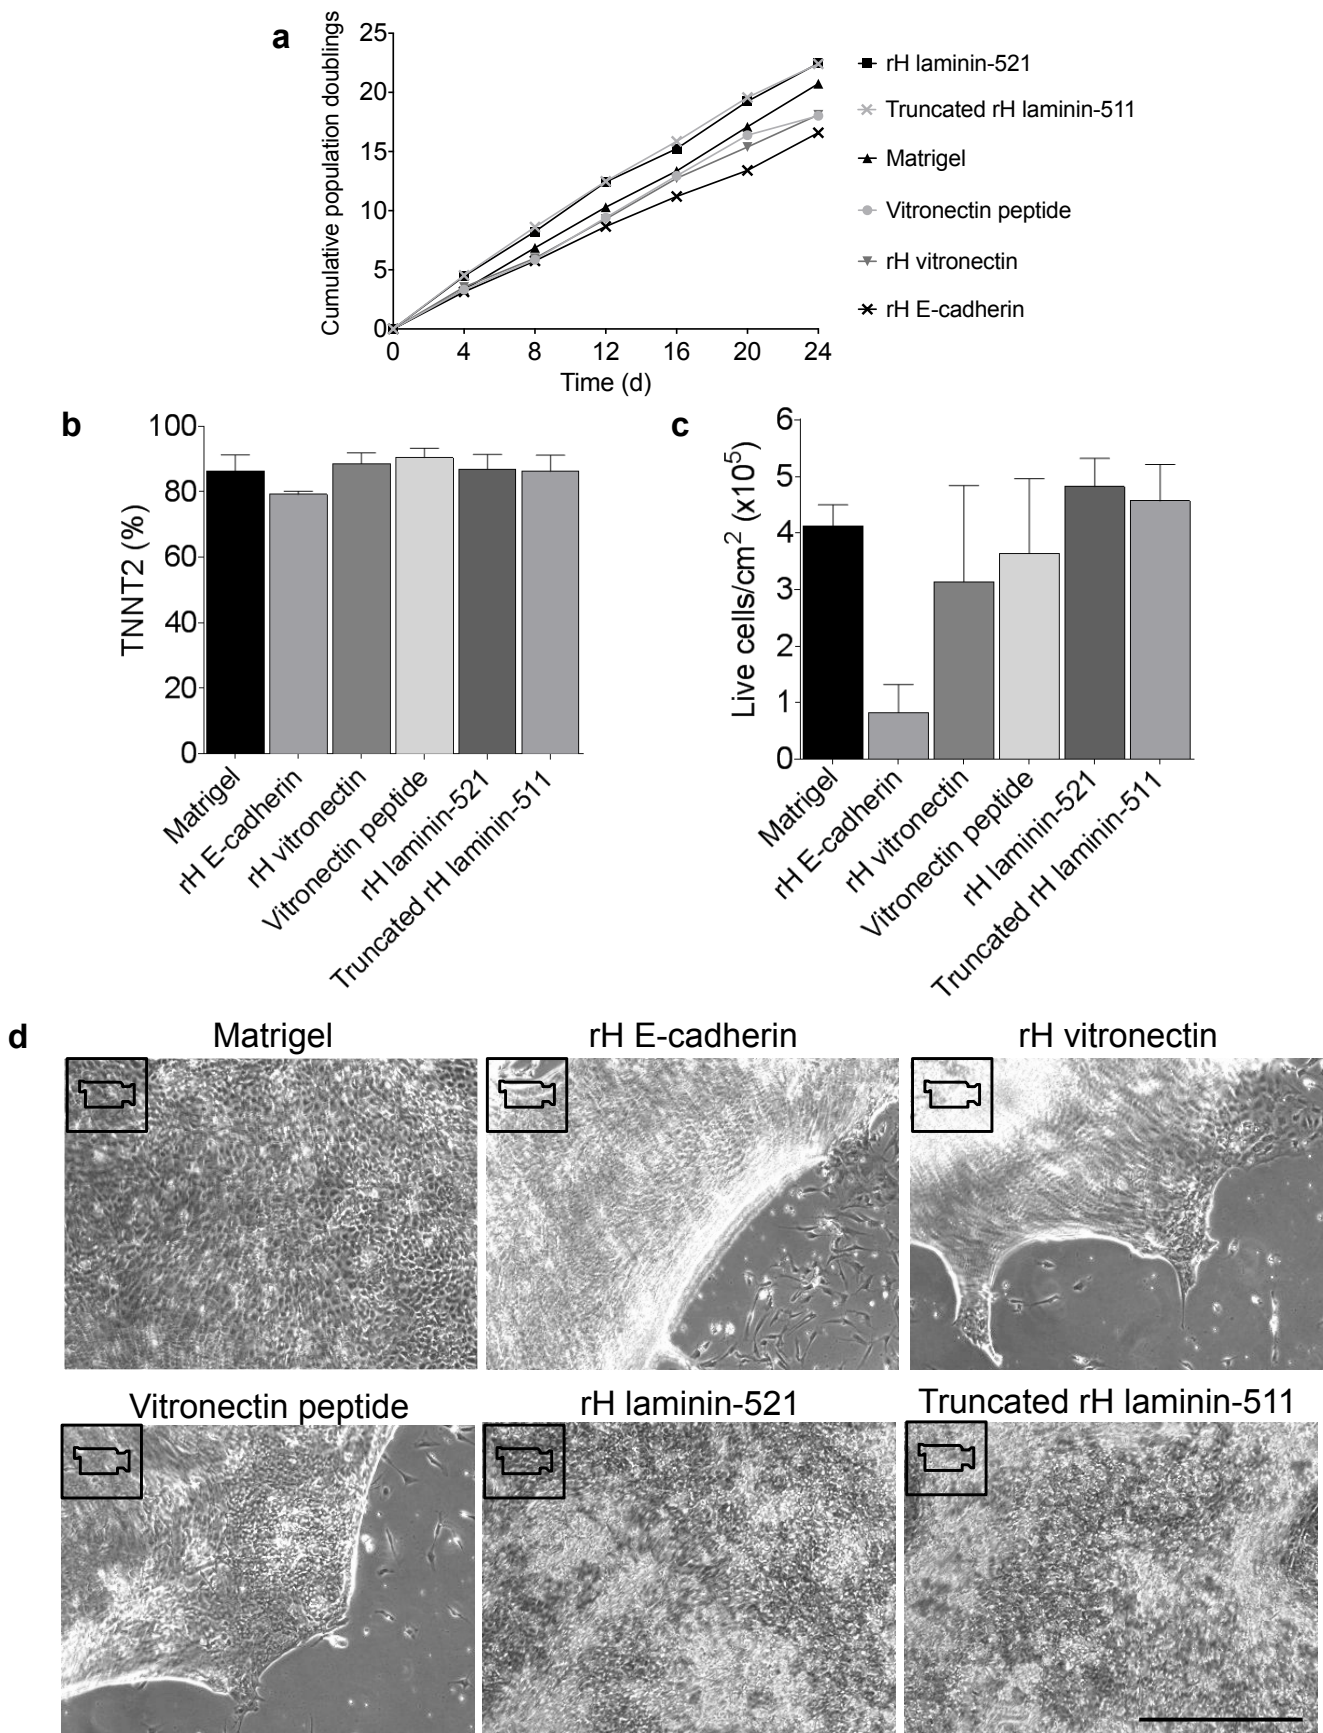

**Supplementary Figure 6** | Cardiac differentiation of hiPSC on chemically defined matrices. **a**) Comparison of growth rates of hiPSC line 59FSDNC3 in E8 media on optimal concentrations of various defined matrices: rH laminin-521, 2.5  $\mu\text{g}/\text{cm}^2$ ; truncated rH laminin-511, 2  $\mu\text{g}/\text{cm}^2$ ; Matrigel, 9  $\mu\text{g}/\text{cm}^2$ ; vitronectin peptide, 625  $\text{ng}/\text{cm}^2$ ; rH vitronectin, 1  $\mu\text{g}/\text{cm}^2$ ; and rH E-cadherin, 1  $\mu\text{g}/\text{cm}^2$ . **b**) Cardiac differentiation efficiency of cells cultured on defined matrices for >6 passages was measured on day 15 by flow cytometry for TNNT2 positive cells,  $n = 3$ . **c**) Yield of live cells at day 15 differentiation from cells cultured on various defined matrices,  $n = 4$ . **d**) Phase contrast images of day 13 cells demonstrating issues with cell adhesion on some matrices. Of note, combining vitronectin peptides with fibronectin peptides (Pronectin) did not alleviate the adhesion issue. Videos of each are provided in Supplementary Video 4-9. Scale bar, 25  $\mu\text{m}$ .

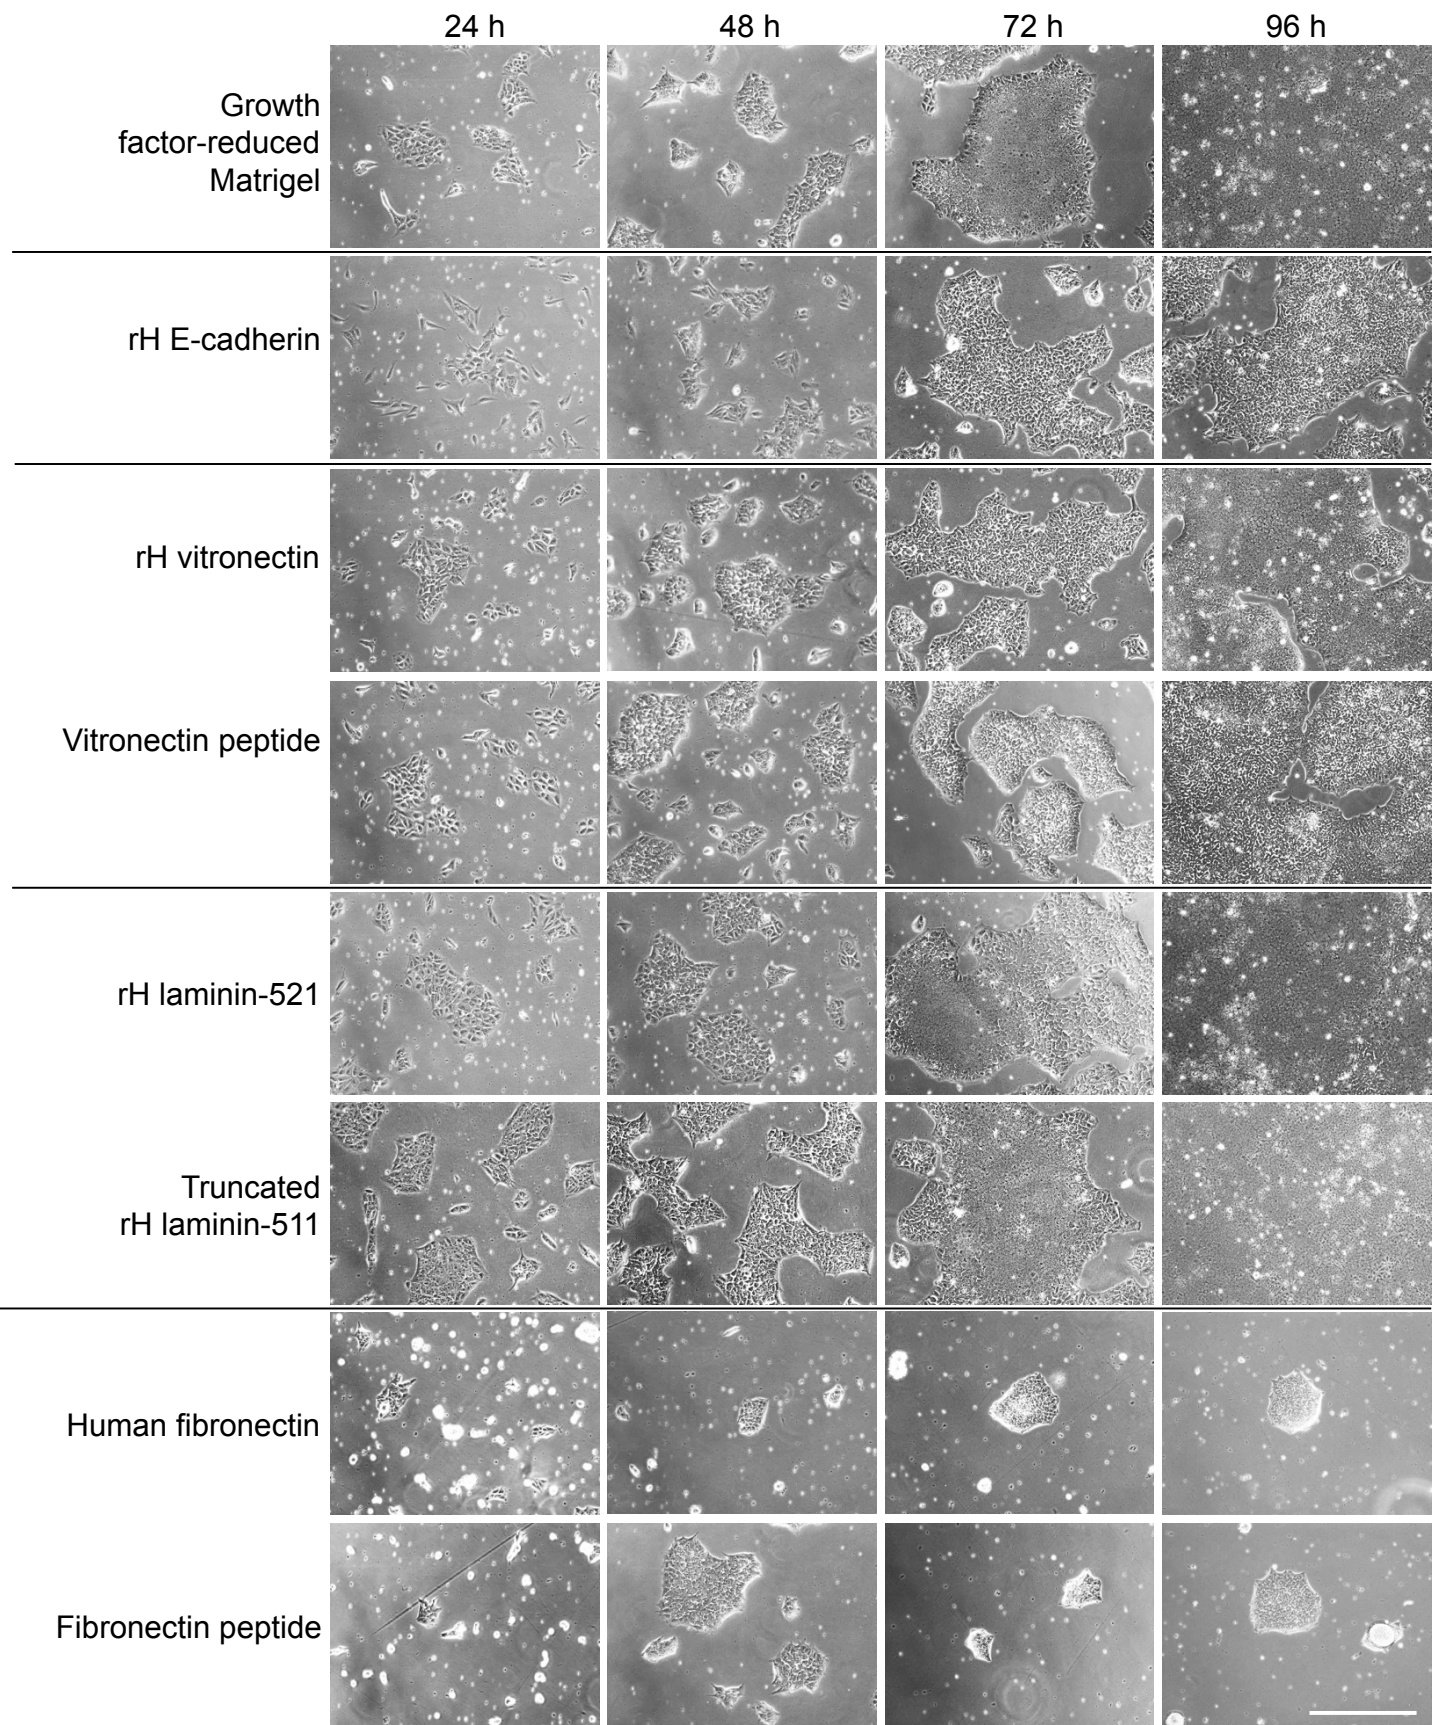

**Supplementary Figure 7** | Pluripotent growth of hiPSC in chemically defined medium on chemically defined matrices. Growth rates of 59FSDNC3 hiPSC in modified E8 media on various defined surfaces, compared to Matrigel. Cells were imaged by phase contrast microscopy after 24, 48, 72, and 96 hours of growth with daily media changes. Scale bar, 100  $\mu$ m.



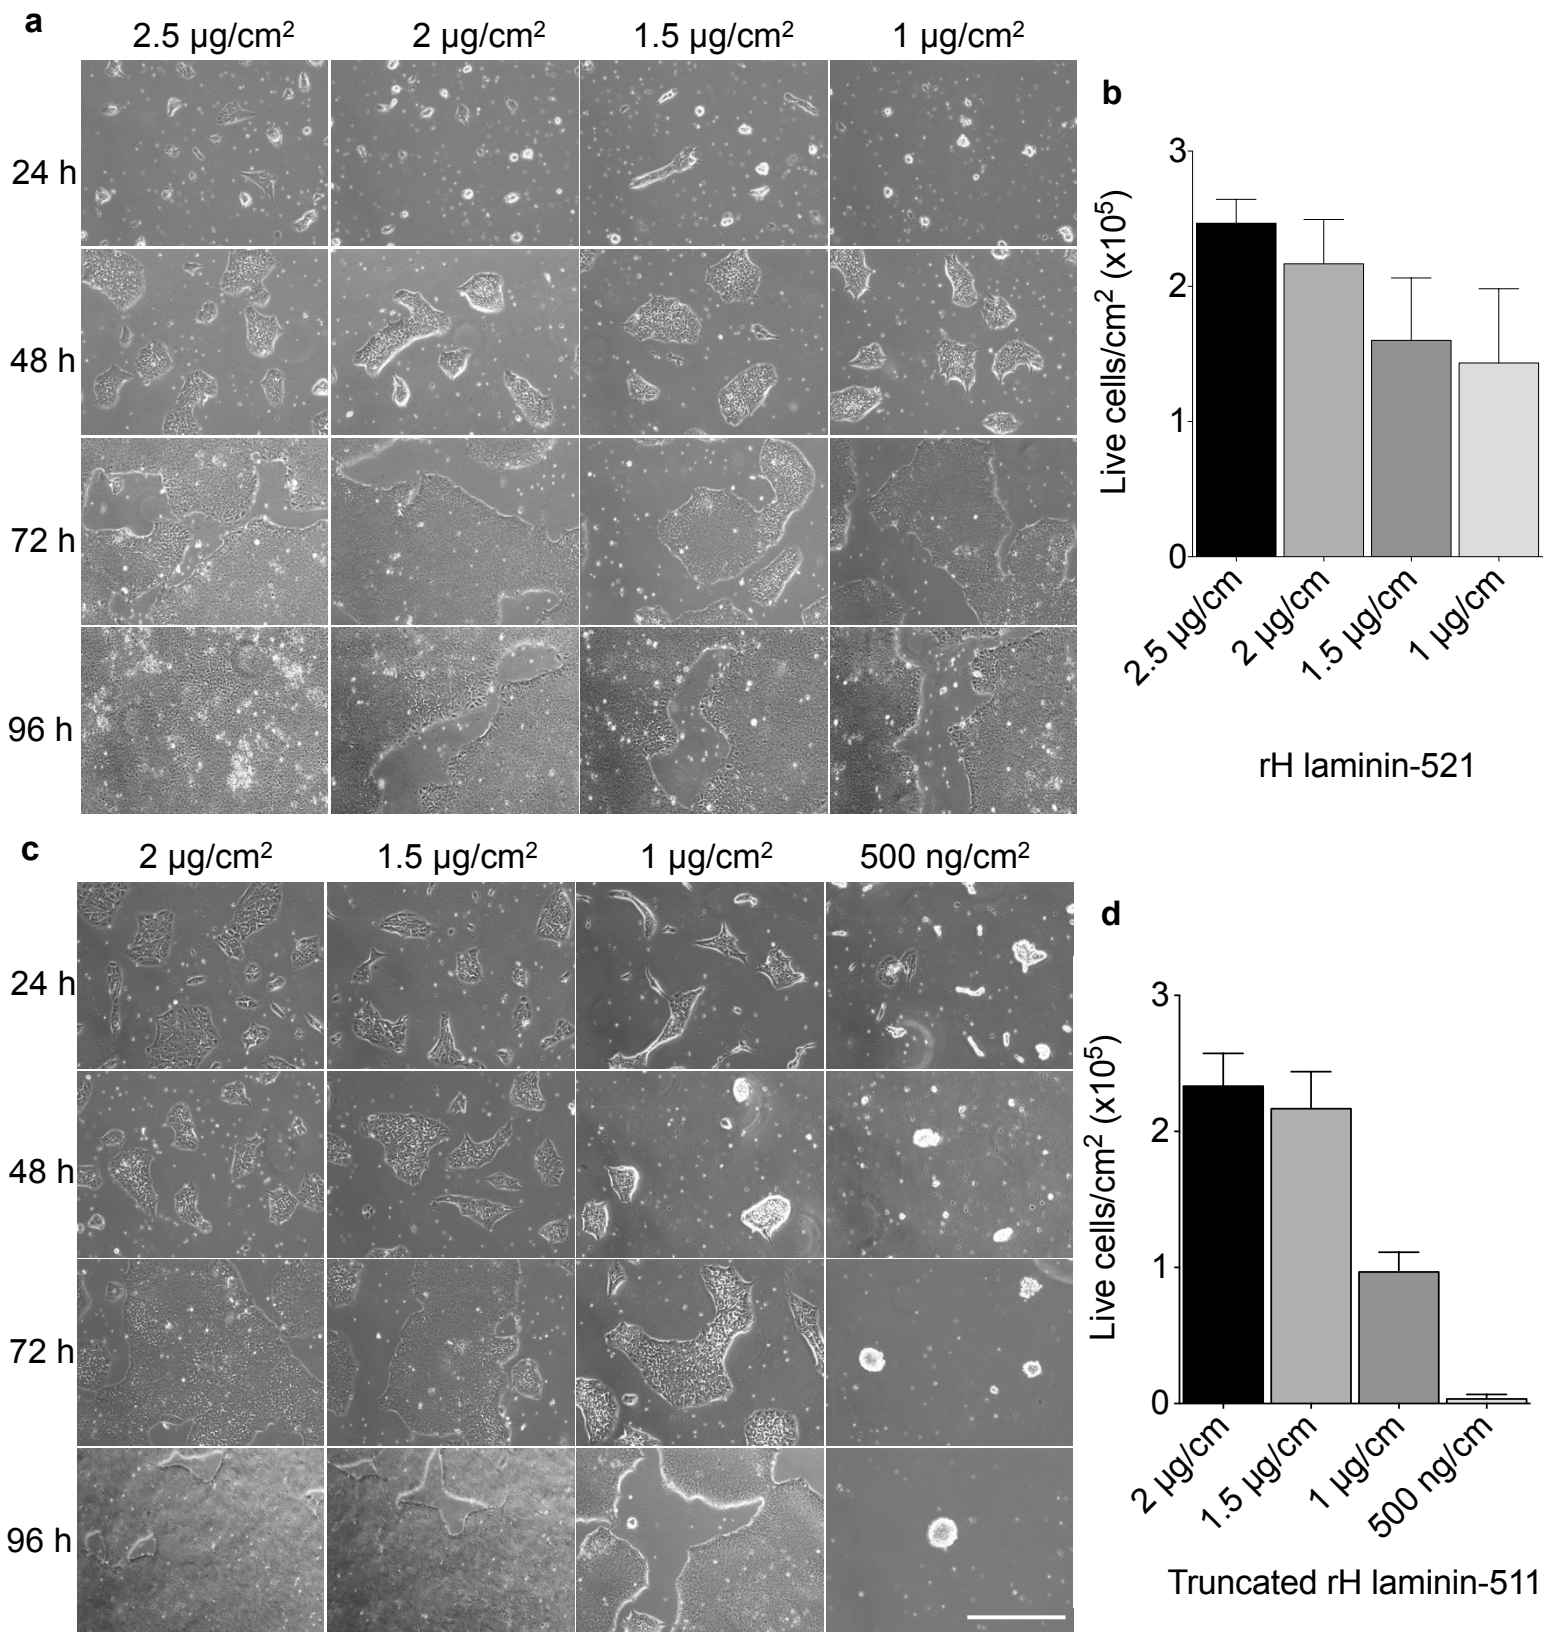

**Supplementary Figure 8** | Pluripotent growth of hiPSC on minimal concentrations of laminin matrices. **a)** Comparison of growth rates of 59FSDNC3 hiPSC in E8 medium. Phase contrast images of cells grown on decreasing concentrations of rH laminin-521 for 96 h. Scale bar, 100  $\mu\text{m}$ . **b)** Plot of live cell yields after seeding cells at  $1.25 \times 10^4$  cells per  $\text{cm}^2$  and 96 h of growth on laminin-521,  $n = 3$ . Error bars represent S.E.M. **c)** Phase contrast images of cells grown on decreasing concentrations of truncated rH laminin-511 for 96 h. Scale bar, 50  $\mu\text{m}$ . **d)** Plot of live cell yields after seeding cells at  $1.25 \times 10^4$  cells per  $\text{cm}^2$  and 96 h of growth on truncated rH laminin-511,  $n = 3$ . Error bars represent S.E.M.

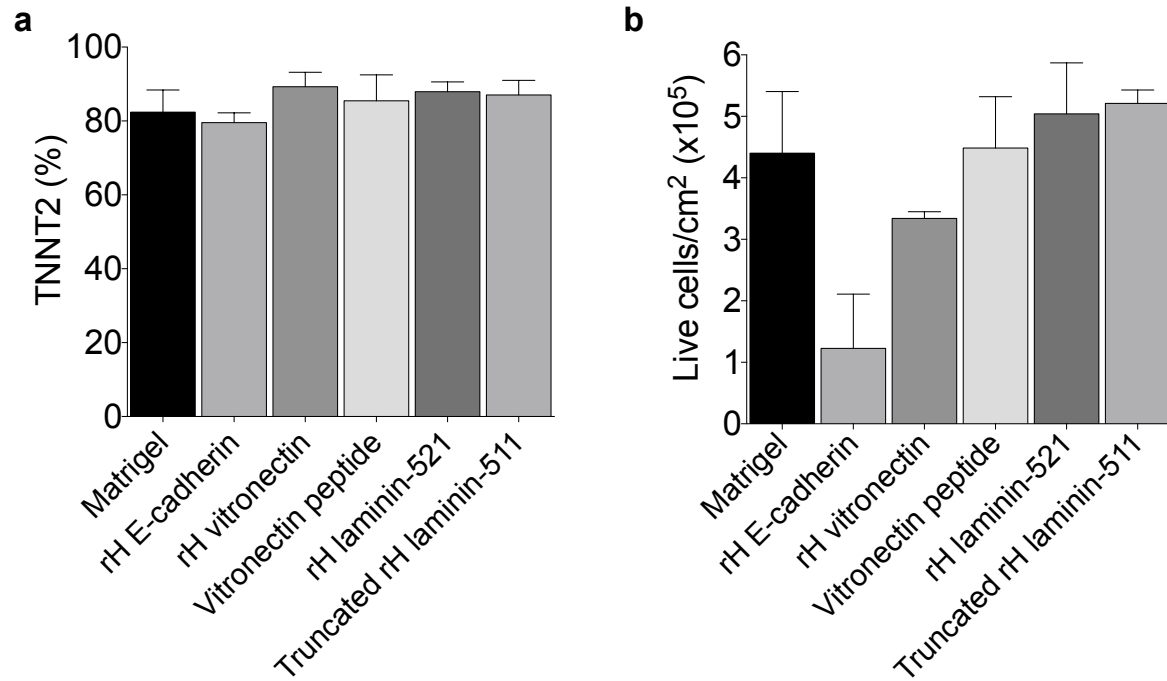

**Supplementary Figure 9** | Growth of hiPSC on Matrigel followed by cardiac differentiation on chemically defined matrices. **a)** Cardiac differentiation efficiency of cells cultured on Matrigel then swapped to defined matrices on d-4, measured on day 15 by flow cytometry for TNNT2 positive cells,  $n = 2$ . **b)** Yield of live hiPSC-derived cardiomyocytes at differentiation day 15 from cells cultured on various defined matrices,  $n = 2$ .

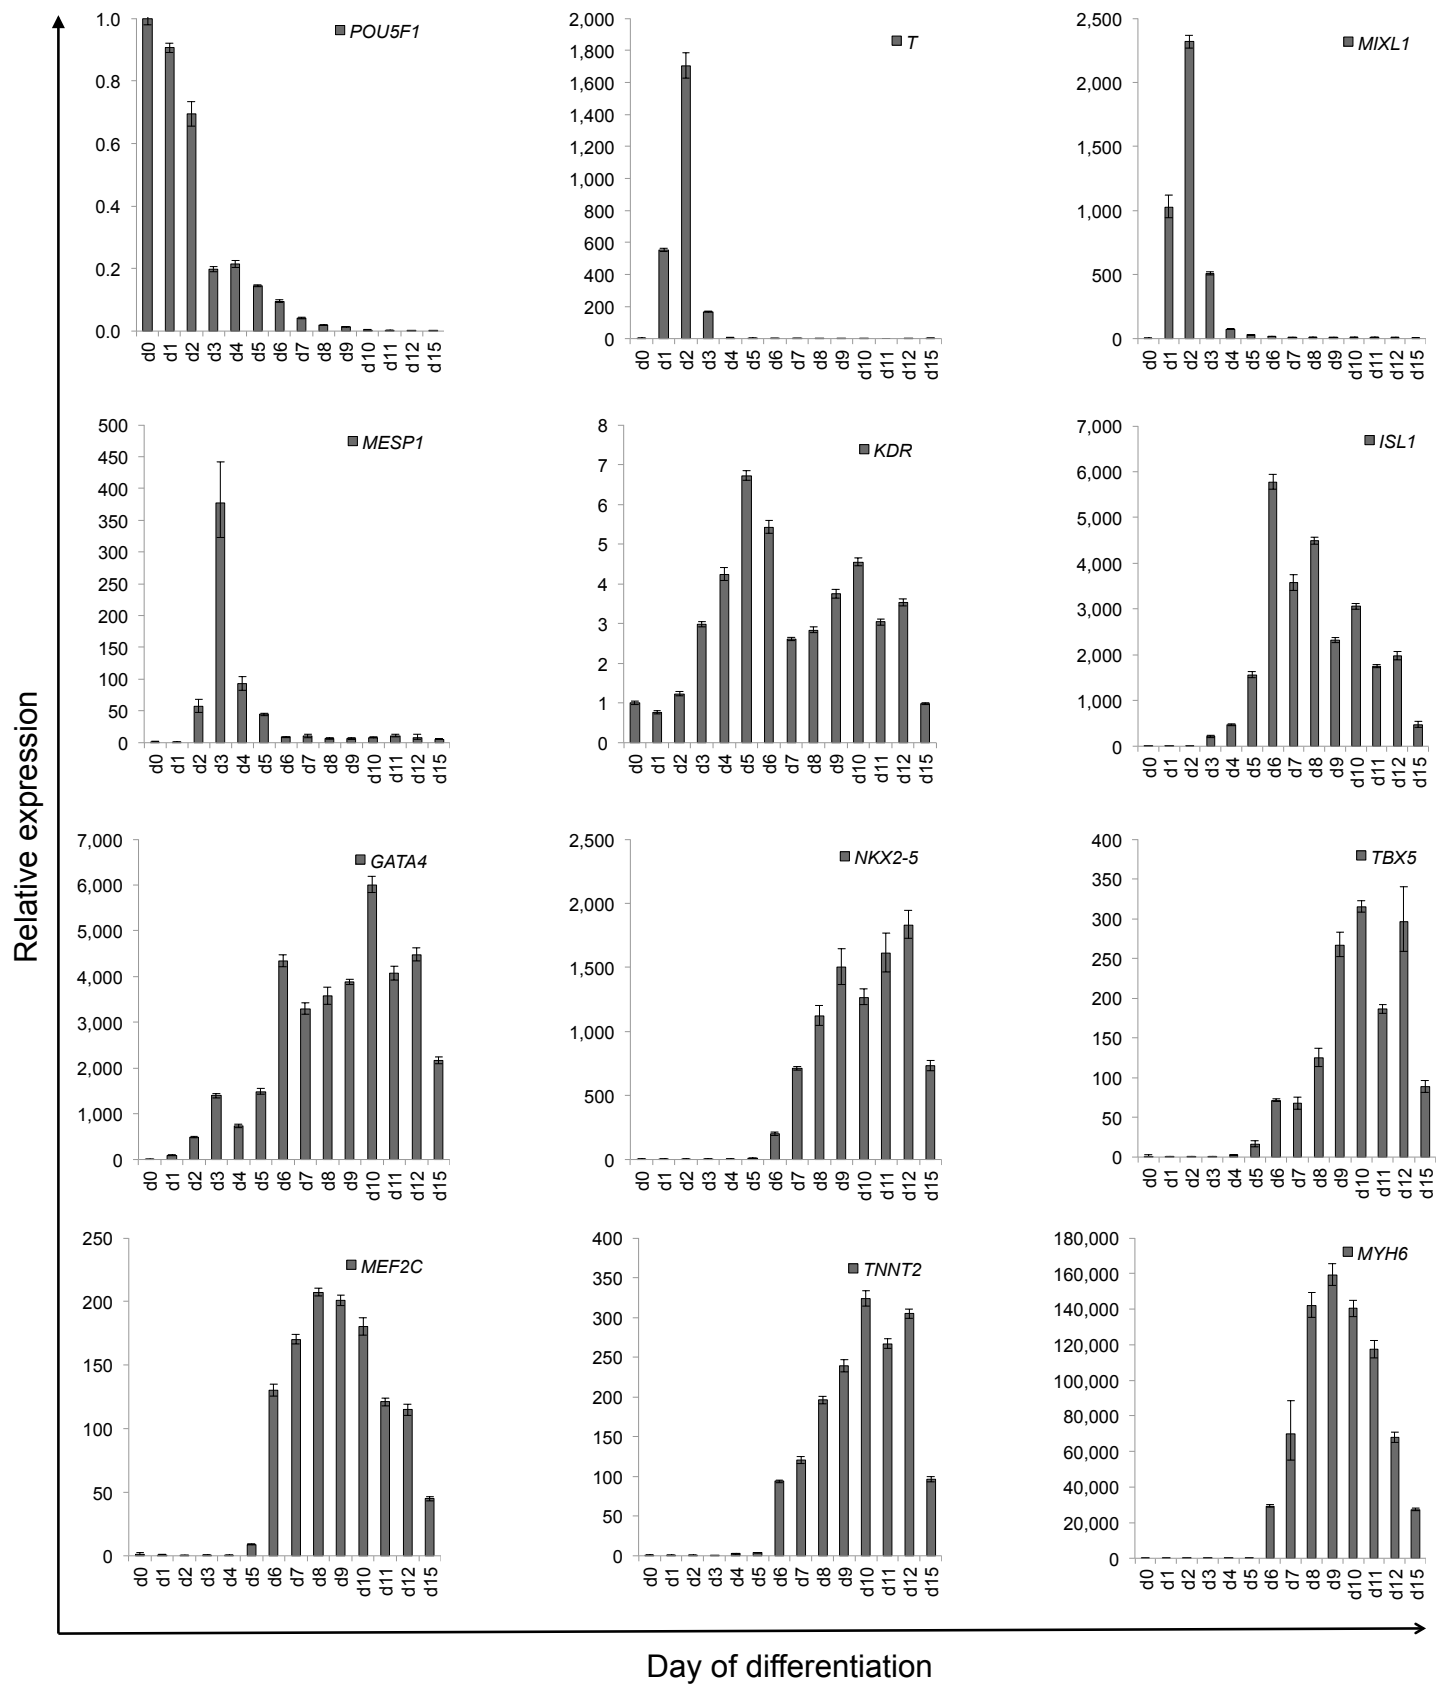

**Supplementary Figure 10 | Gene expression during chemically defined cardiac differentiation.** Real-time RT-PCR for markers of pluripotency (*POU5F1*), mesoderm (*T* and *MIXL1*), cardiac mesoderm (*MESP1* and *KDR*), committed cardiac progenitors (*ISL1*, *GATA4*, *NKX2-5*, *TBX5*, and *MEF2C*), and cardiomyocytes (*TNNT2* and *MYH6*). Samples used in this analysis were matched pairs for phase contrast images in Supplementary Fig. 5. Error bars represent S.D. of technical quadruplicates.

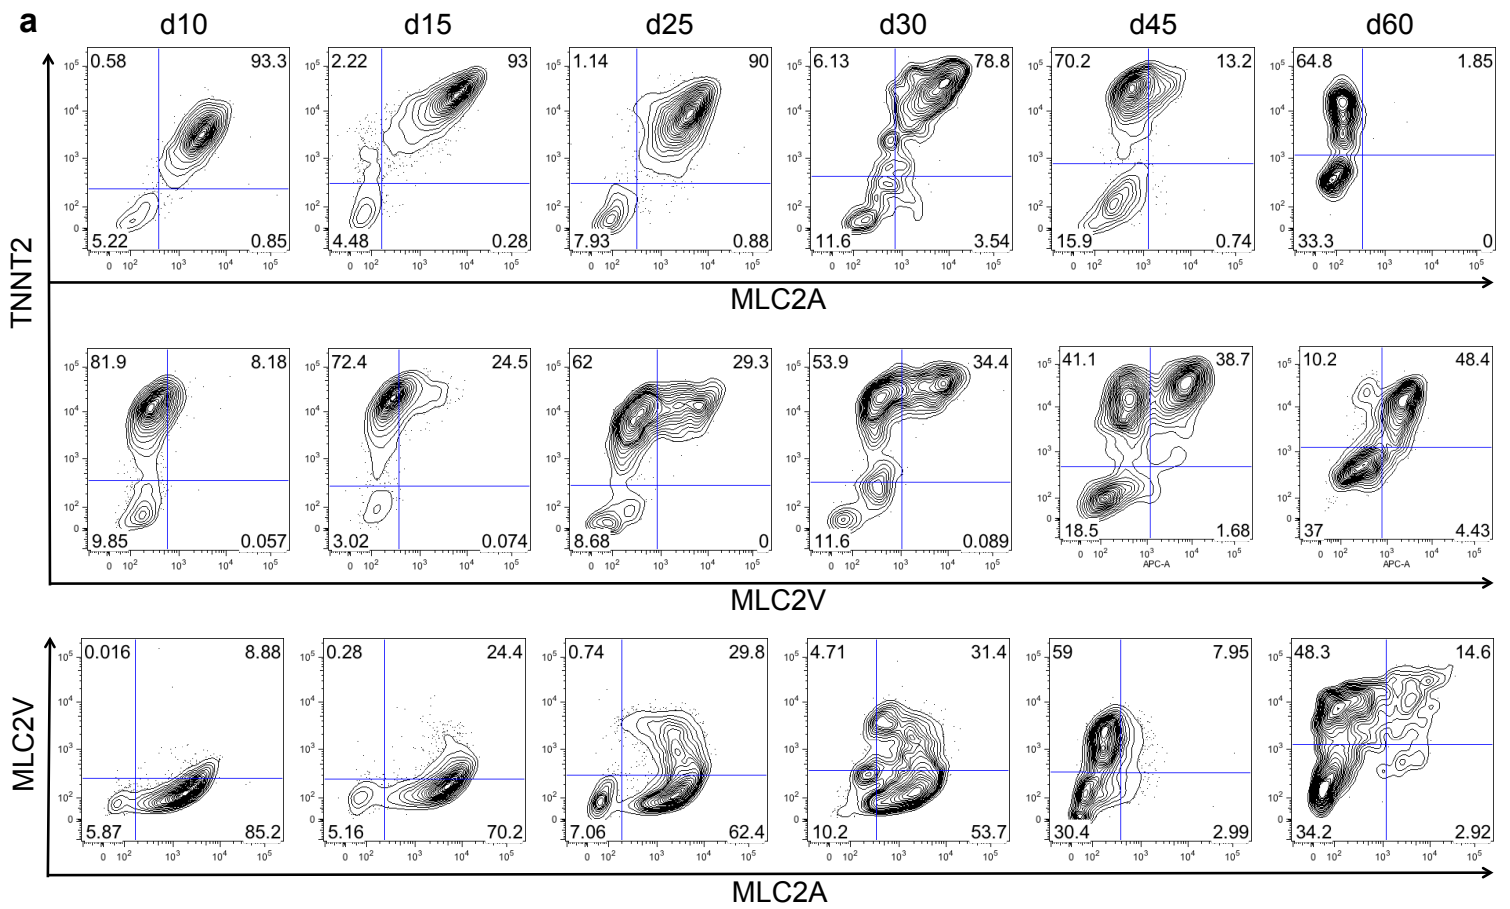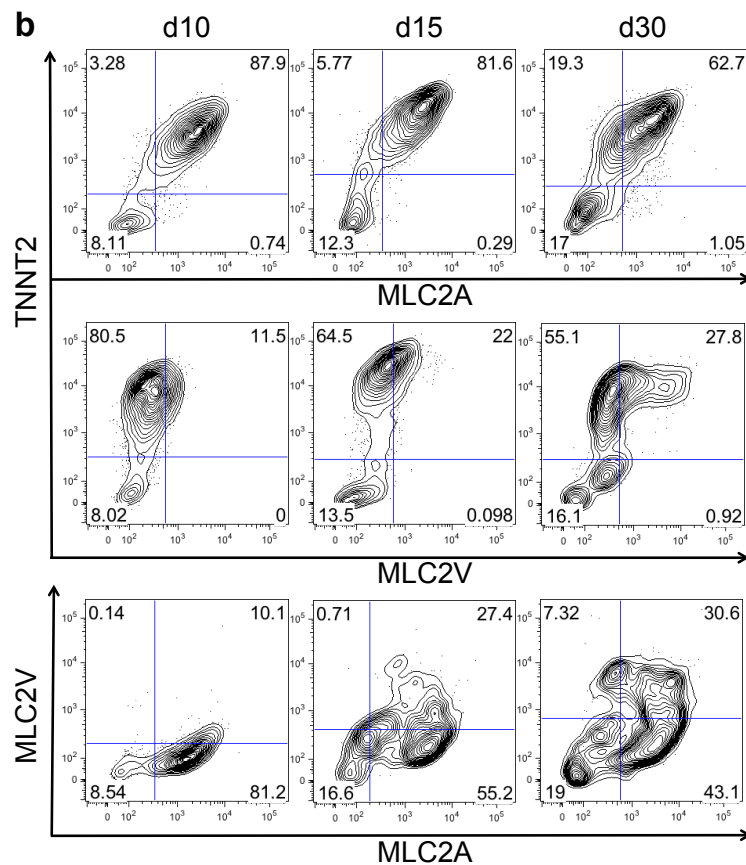

**Supplementary Figure 11** | Characterization of atrial vs. ventricular profile of cardiomyocytes produced under chemically defined conditions using flow cytometry. **a**) Flow cytometry assessment of expression of cardiac troponin T (TNNT2), atrial myosin light chain 2 (MLC2A), and ventricular myosin light chain (MLC2V) in cardiomyocytes derived and maintained in CDM3 at differentiation from day 10 through day 60. **b**) Flow cytometry assessment of expression of TNNT2, MLC2V, and MLC2A in cardiomyocytes differentiated using RPMI+B27-ins media at differentiation day 10 through day 30.

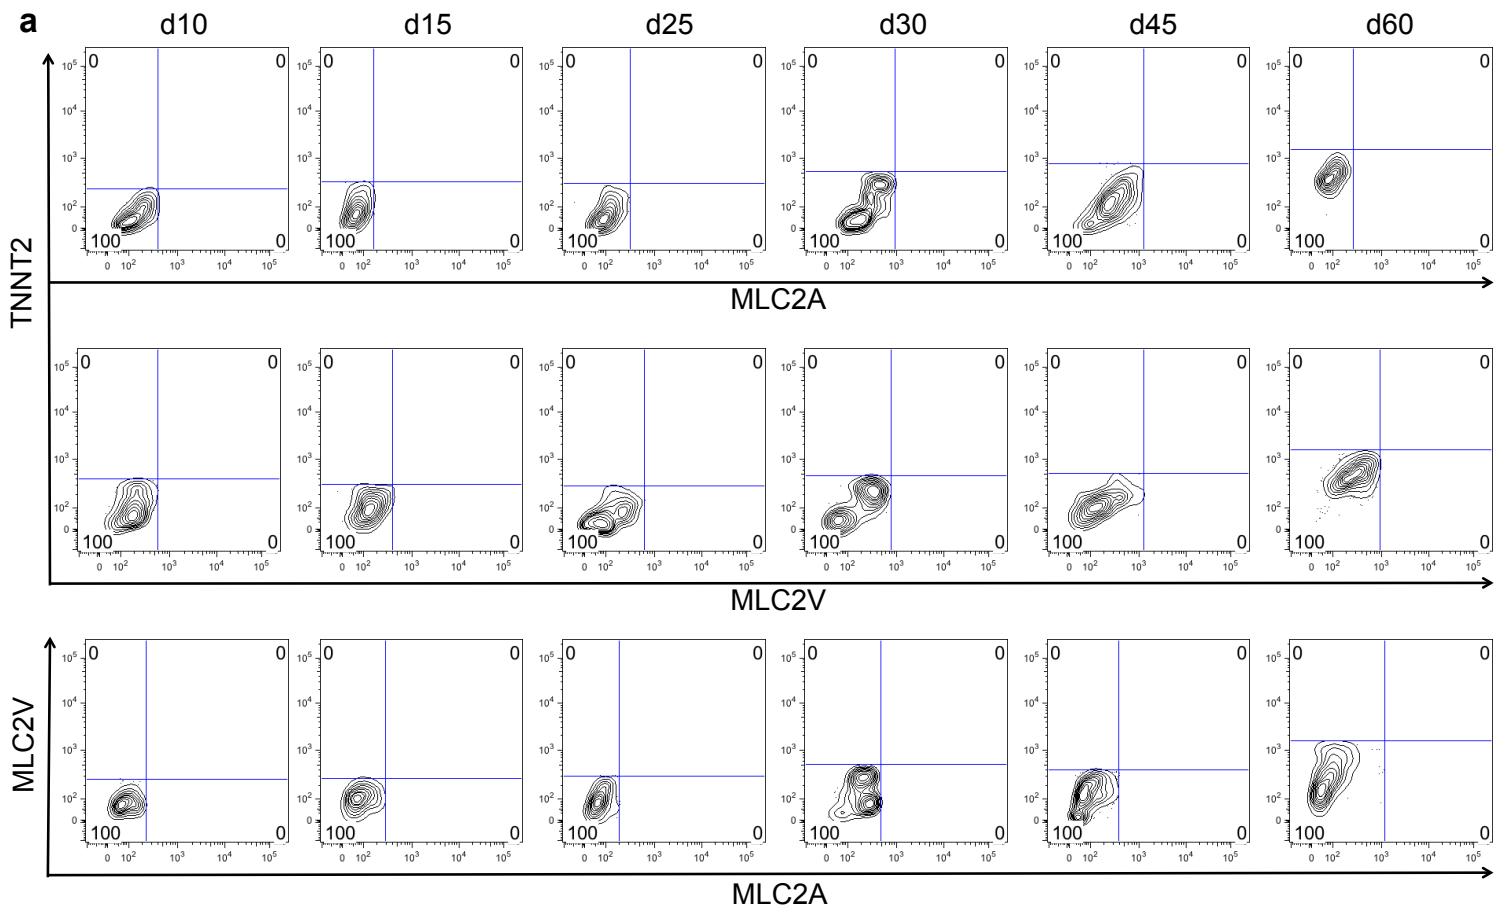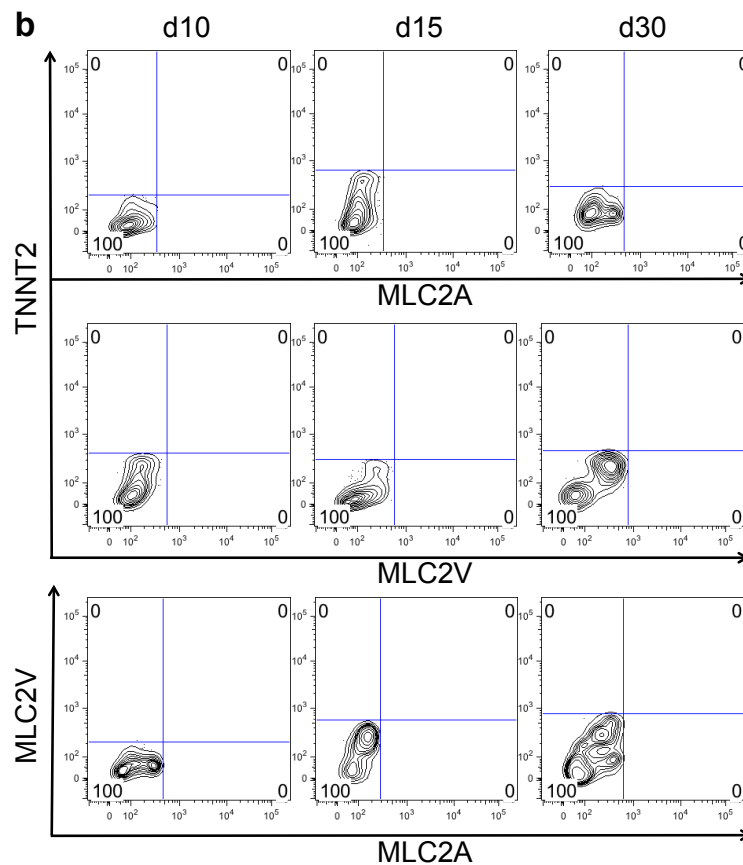

**Supplementary Figure 12 | Isotype controls for TNNT2, MLC2A, and MLC2V flow cytometry assessment. a) Cells differentiated in CDM3. Matched to Supplementary Fig. 11a. b) Cells differentiated RPMI+B27-ins. Matched to Supplementary Fig. 11a.**

**Supplementary Table 1** | Analysis of components of defined media demonstrated effective for hESC cardiac differentiation. The constituent components of four defined media formulae, which have proven successful in either monolayer or embryoid body-based cardiac differentiation, were assessed to begin elucidation of macromolecules essential for cardiac differentiation. Concentration of L-glutamine/GlutaMAX is calculated as total in media, including any that is present in the basal media.

| RPMI+B27-ins<br>(Uosaki <i>et al.</i> 2011) <sup>15</sup> |        | LI-APEL<br>(Elliot <i>et al.</i> 2011) <sup>9</sup> |       | StemPro-34 SFM based<br>(Yang <i>et al.</i> 2008) <sup>8</sup> |       | Xeno-free Differentiation Medium<br>(Burrige <i>et al.</i> 2011) <sup>2</sup> |       |
|-----------------------------------------------------------|--------|-----------------------------------------------------|-------|----------------------------------------------------------------|-------|-------------------------------------------------------------------------------|-------|
|                                                           | µg/mL  |                                                     | µg/mL |                                                                | µg/mL |                                                                               | µg/mL |
| RPMI 1640                                                 |        | IMDM:F12, 5% PFHMII                                 |       | IMDM                                                           |       | RPMI                                                                          |       |
| L-glutamine (2 mM)                                        | 300    | L-alanyl-L-glutamine (4 mM)                         | 892   | L-glutamine (2 mM)                                             | 300   | L-glutamine (2 mM)                                                            | 300   |
| BSA                                                       | 2500   | Albucult                                            | 5000  | HSA                                                            | 5000  | HSA                                                                           | 5000  |
|                                                           |        | rH insulin                                          | 1     | Human Insulin                                                  | 10    |                                                                               |       |
| Holo transferrin                                          | 5      | Holo transferrin                                    | 54    | Holo transferrin                                               | 250   |                                                                               |       |
| Sodium selenite                                           | 0.0144 | Sodium selenite                                     | 0.07  | Sodium selenite                                                | 0.005 |                                                                               |       |
| Ethanolamine                                              | 1      | Ethanolamine                                        | 203   | Ethanolamine                                                   | 10    |                                                                               |       |
| <b>Steroids</b>                                           |        |                                                     |       |                                                                |       |                                                                               |       |
| Corticosterone                                            | 0.02   |                                                     |       | Hydrocortisone                                                 | 0.04  |                                                                               |       |
| Progesterone                                              | 0.0063 |                                                     |       |                                                                |       |                                                                               |       |
| <b>Lipids</b>                                             |        |                                                     |       |                                                                |       |                                                                               |       |
| Linoleic acid                                             | 1      | Linoleic acid                                       | 0.1   | Human EX-CYTE                                                  | 5     | Chemically defined lipids                                                     | 1x    |
| Linolenic acid                                            | 1      | Linolenic acid                                      | 0.1   |                                                                |       |                                                                               |       |
| Lipoic acid                                               | 0.047  | Synthetic cholesterol                               | 2.2   |                                                                |       |                                                                               |       |
| <b>Vitamins</b>                                           |        |                                                     |       |                                                                |       |                                                                               |       |
| Retinol, all trans (vit. A)                               | 0.1    | L-ascorbic acid 2-phosphate                         | 50    | L-ascorbic acid                                                | 50    | L-ascorbic acid                                                               | 50    |
| Retinol acetate (vit. A)                                  | 0.1    |                                                     |       |                                                                |       |                                                                               |       |
| D,L-a-tocopherol (vit. E)                                 | 1      |                                                     |       |                                                                |       |                                                                               |       |
| D,L-a-tocopherol acetate (vit. E)                         | 1      |                                                     |       | D,L-a-tocopherol acetate                                       | 0.02  |                                                                               |       |
| Biotin (vit. B <sub>7</sub> )                             | 0.1    |                                                     |       |                                                                |       |                                                                               |       |
| <b>Antioxidants</b>                                       |        |                                                     |       |                                                                |       |                                                                               |       |
| Catalase                                                  | 2.5    | 1-thioglycerol                                      | 49    | 2-mercaptoethanol                                              | 4     | 1-thioglycerol                                                                | 49    |
| Glutathione (reduced)                                     | 1      |                                                     |       | 1-thioglycerol                                                 | 49    |                                                                               |       |
| Superoxidase dismutase                                    | 2.5    |                                                     |       |                                                                |       |                                                                               |       |
| <b>Other</b>                                              |        |                                                     |       |                                                                |       |                                                                               |       |
| T3 (triiodol-L-thyronine)                                 | 0.002  | Polyvinyl alcohol                                   | 500   |                                                                |       |                                                                               |       |
| L-carnitine                                               | 2      |                                                     |       |                                                                |       |                                                                               |       |
| D(+)-galactose                                            | 15     |                                                     |       |                                                                |       |                                                                               |       |
| Putrescine                                                | 16.1   |                                                     |       |                                                                |       |                                                                               |       |



**Supplementary Table 3 | Optimization of timing of Wnt signaling modulation on cardiac differentiation efficiency. a)** Time points for the addition of GSK3B inhibitor (CHIR99021) and Wnt inhibitor (Wnt-C59) in CDM3 were modified as shown. **b)** Time points for the addition of CHIR99021 and Wnt-C59 in RPMI+B27-ins were modified as shown. Percentage of TNNT2<sup>+</sup> cells was measured at day 15 using flow cytometry; -, 0-10% TNNT2<sup>+</sup>; +, 10-60% TNNT2<sup>+</sup>; ++, 60-65% TNNT2<sup>+</sup>; +++, 65-75% TNNT2<sup>+</sup>; +++++, >75% TNNT2<sup>+</sup>; Δ, media change, *n* = 2 (hiPSC line 59FSDNC3 and hESC line H7).

| Application of small molecule inhibitors on specific days of differentiation in CDM3 |        |      |      |      |      | Relative efficiency | % TNNT2 <sup>+</sup> |
|--------------------------------------------------------------------------------------|--------|------|------|------|------|---------------------|----------------------|
| d0                                                                                   | d1     | d2   | d3   | d4   | d5   |                     |                      |
| GSK3βi                                                                               |        | WNTi |      |      | Δ    | -                   |                      |
| GSK3βi                                                                               |        | WNTi |      | Δ    |      | -                   |                      |
| GSK3βi                                                                               |        | WNTi | Δ    |      | Δ    | ++                  | 56.2±10.3            |
| GSK3βi                                                                               |        | WNTi | Δ    | Δ    |      | +                   | 12.2±5.6             |
| GSK3βi                                                                               |        | WNTi |      | Δ    |      | ++                  | 59.2±7.9             |
| GSK3βi                                                                               |        | Δ    |      | WNTi |      | +++                 | 68.4±15.6            |
| GSK3βi                                                                               |        | Δ    |      | WNTi | Δ    | +++                 | 67.2±9.4             |
| GSK3βi                                                                               |        | Δ    |      | Δ    | WNTi | -                   |                      |
| GSK3βi                                                                               | Δ      |      | WNTi |      | Δ    | ++                  | 60.7±7.9             |
| GSK3βi                                                                               | Δ      |      | WNTi | Δ    |      | ++                  | 58.4±12.4            |
| GSK3βi                                                                               | Δ      |      | WNTi | Δ    | Δ    | ++                  | 60.1±15.4            |
| GSK3βi                                                                               | Δ      |      | Δ    |      | WNTi | -                   |                      |
| GSK3βi                                                                               | Δ      |      | Δ    |      | WNTi | ++                  | 40.1±20.2            |
| GSK3βi                                                                               | Δ      |      | Δ    | WNTi | Δ    | +                   | 30.7±12.4            |
| GSK3βi                                                                               | Δ      |      | Δ    | Δ    | WNTi | -                   |                      |
|                                                                                      | GSK3βi |      | WNTi |      | Δ    | ++++                | 84.1±9.1             |
|                                                                                      | GSK3βi |      | WNTi |      | Δ    | ++++                | 86.1±10.0            |
|                                                                                      | GSK3βi |      | WNTi | Δ    | Δ    | ++++                | 78.0±9.8             |
|                                                                                      | GSK3βi |      | Δ    |      | WNTi | -                   |                      |
|                                                                                      | GSK3βi |      | Δ    |      | WNTi | +++                 | 65.4±5.6             |
|                                                                                      | GSK3βi |      | Δ    | WNTi | Δ    | +++                 | 61.1±13.2            |
|                                                                                      | GSK3βi |      | Δ    | Δ    | WNTi | -                   |                      |

  

| Application of small molecule inhibitors on specific days of differentiation in RPMI+B27-ins |        |    |      |    |      | Relative efficiency | % TNNT2 <sup>+</sup> |
|----------------------------------------------------------------------------------------------|--------|----|------|----|------|---------------------|----------------------|
| d0                                                                                           | d1     | d2 | d3   | d4 | d5   |                     |                      |
|                                                                                              | GSK3βi |    | WNTi |    | Δ    | ++                  | 64.3±5.1             |
|                                                                                              | GSK3βi |    | WNTi |    | Δ    | ++                  | 63.9±15.5            |
|                                                                                              | GSK3βi |    | WNTi | Δ  | Δ    | +                   | 44±20.1              |
|                                                                                              | GSK3βi |    | Δ    |    | WNTi | ++++                | 78±4.5               |
|                                                                                              | GSK3βi |    | Δ    |    | WNTi | ++++                | 81.4±3.4             |



**Supplementary Table 4 |** Electrophysiological characterization of cardiomyocytes produced under chemically defined conditions. **a)** Action potential (AP) recordings using whole cell patch clamp of hiPSC-derived cardiomyocytes differentiated in CDM3 from day 15 to day 20 of differentiation. The AP characteristics used to classify cells into atrial-, nodal-, or ventricular-like. Includes MDP (maximum diastolic potential), peak voltage, APA (action potential amplitude),  $dv/dt_{max}$  (maximal rate of depolarization), and AP duration at different levels of repolarization (i.e., 90 or 50%). To determine the type of cardiomyocyte analyzed, subtypes were specified using the following characteristics: Ventricular-like, a negative maximum diastolic membrane potential ( $< -50$  mV), a rapid AP upstroke, a long plateau phase,  $APA > 90$  mV, and  $APD_{90}/APD_{50}$  ratio  $< 1.4$ . Atrial-like, absence of a prominent plateau phase, a negative diastolic membrane potential ( $< -50$  mV), and  $APD_{90}/APD_{50}$  ratio  $> 1.7$ . Nodal-like, a more positive MDP, a slower AP upstroke, a prominent phase 4 depolarization, and  $APD_{90}/APD_{50}$  ratio in between 1.4-1.7. **b)** Assessment of cells differentiated in CDM3 at day 30 to 35 of differentiation. The AP characteristics used to classify cells into atrial-, nodal-, or ventricular-like (as above).

**a**

|         | APs<br>(n = 26)             | Interval (s)  | MDP<br>(mV)     | Peak<br>(mV)   | APA<br>(mV)    | $dv/dt_{max}$<br>(V/s) | $APD_{90}$<br>(ms) | $APD_{50}$<br>(ms) | $APD_{90}/$<br>$APD_{50}$ |
|---------|-----------------------------|---------------|-----------------|----------------|----------------|------------------------|--------------------|--------------------|---------------------------|
| d15-d20 | Atrial-like<br>(n = 19)     | $0.7 \pm 0.1$ | $-55.2 \pm 2.0$ | $26.2 \pm 1.2$ | $81.3 \pm 2.8$ | $5.2 \pm 0.4$          | $140.0 \pm 10.0$   | $72.4 \pm 5.0$     | $2.0 \pm 0.1$             |
|         | Nodal-like<br>(n = 5)       | $0.8 \pm 0.1$ | $-45.4 \pm 1.0$ | $22.7 \pm 1.5$ | $68.1 \pm 1.6$ | $4.0 \pm 0.1$          | $135.1 \pm 14.6$   | $82.4 \pm 10.0$    | $1.7 \pm 0.1$             |
|         | Ventricular-like<br>(n = 2) | $1.5 \pm 0.2$ | $-54 \pm 2.0$   | $35.9 \pm 1.6$ | $89.9 \pm 3.6$ | $7.8 \pm 0.6$          | $188.8 \pm 8.3$    | $142.3 \pm 2.9$    | $1.3 \pm 0.1$             |

**b**

|         | APs<br>(n = 13)             | Interval (s)   | MDP<br>(mV)     | Peak<br>(mV)   | APA<br>(mV)    | $dv/dt_{max}$<br>(V/s) | $APD_{90}$<br>(ms) | $APD_{50}$<br>(ms) | $APD_{90}/$<br>$APD_{50}$ |
|---------|-----------------------------|----------------|-----------------|----------------|----------------|------------------------|--------------------|--------------------|---------------------------|
| d30-d35 | Atrial-like<br>(n = 4)      | $0.6 \pm 0.2$  | $-55.1 \pm 2.4$ | $35.7 \pm 2.0$ | $90.8 \pm 3.0$ | $6.7 \pm 0.7$          | $138.8 \pm 25.0$   | $75.3 \pm 14.3$    | $1.9 \pm 0.05$            |
|         | Nodal-like<br>(n = 2)       | $0.3 \pm 0.01$ | $-47.4 \pm 1.0$ | $21.7 \pm 0.9$ | $69.1 \pm 1.3$ | $2.9 \pm 0.1$          | $73.9 \pm 1.1$     | $48.9 \pm 0.10$    | $1.5 \pm 0.02$            |
|         | Ventricular-like<br>(n = 7) | $0.4 \pm 0.04$ | $-57.8 \pm 1.7$ | $41.0 \pm 3.4$ | $98.8 \pm 3.3$ | $9.2 \pm 0.6$          | $218.7 \pm 46.2$   | $192.5 \pm 44.3$   | $1.2 \pm 0.03$            |

**Supplementary Table 5** | Taqman gene expression assays used for time course real time RT-PCR

| Category            | Gene symbol   | TaqMan assay  |
|---------------------|---------------|---------------|
| Housekeeping        | <i>18S</i>    | Hs99999901_s1 |
| Pluripotency        | <i>NANOG</i>  | Hs02387400_g1 |
|                     | <i>POU5F1</i> | Hs00999632_g1 |
|                     | <i>SOX2</i>   | Hs01053049_s1 |
|                     | <i>KLF4</i>   | Hs00358836_m1 |
|                     | <i>LIN28</i>  | Hs00702808_s1 |
|                     | <i>MYC</i>    | Hs00153408_m1 |
|                     | <i>UTF1</i>   | Hs00747497_g1 |
|                     | <i>ABCG2</i>  | Hs01053790_m1 |
|                     | <i>DMNT3B</i> | Hs01002405_m1 |
| Mesoderm            | <i>TERT</i>   | Hs99999022_m1 |
|                     | <i>TP53</i>   | Hs99999147_m1 |
| Cardiac mesoderm    | <i>MESP1</i>  | Hs00251489_m1 |
| Cardiac development | <i>KDR</i>    | Hs00176676_m1 |
|                     | <i>MEF2C</i>  | Hs00231149_m1 |
|                     | <i>GATA4</i>  | Hs00171403_m1 |
|                     | <i>ISL1</i>   | Hs01099687_m1 |
|                     | <i>TBX5</i>   | Hs00361155_m1 |
|                     | <i>NKX2-5</i> | Hs00231763_m1 |
| Cardiac structure   | <i>TNNT2</i>  | Hs00165960_m1 |
|                     | <i>MYH6</i>   | Hs00411908_m1 |

**Supplementary Table 6 | Taqman gene expression assays used for single cell real time RT-PCR**

| Category            | Gene symbol                             | TaqMan assay  |
|---------------------|-----------------------------------------|---------------|
| Housekeeping        | <i>18S</i>                              | Hs99999901_s1 |
|                     | <i>GAPDH</i>                            | Hs99999905_m1 |
| Pluripotency        | <i>ZFP42</i>                            | Hs00399279_m1 |
| Ectoderm            | <i>SOX3</i>                             | Hs00271627_m1 |
| Endoderm            | <i>FOXA2</i>                            | Hs00232764_m1 |
| Mesoderm            | <i>T (Brachyury)</i>                    | Hs00610080_m1 |
|                     | <i>MIXL1</i>                            | Hs00430824_g1 |
| Cardiac development | <i>NKX2-5</i>                           | Hs00231763_m1 |
|                     | <i>ISL1</i>                             | Hs01099687_m1 |
| Cardiac structure   | <i>TNNT2</i>                            | Hs00165960_m1 |
|                     | <i>MYH6</i>                             | Hs00411908_m1 |
|                     | <i>MYH7</i>                             | Hs01110632_m1 |
|                     | <i>TNNI3</i>                            | Hs00165957_m1 |
| Atrial/ventricular  | <i>MYL7 (MLC2a) - constitutive</i>      | Hs01085598_g1 |
|                     | <i>MYL2 (MLC2v) - ventricular</i>       | Hs00166405_m1 |
|                     | <i>NPPA (ANP) - atrial</i>              | Hs00383230_g1 |
|                     | <i>NPPB (BNP) – constitutive</i>        | Hs01057466_g1 |
|                     | <i>SLN - atrial</i>                     | Hs01888464_s1 |
|                     | <i>IRX4 - atrial</i>                    | Hs00212560_m1 |
| Nodal               | <i>TBX18 - nodal</i>                    | Hs01385457_m1 |
| Gap junction        | <i>Connexin-40 (GJA5) - atrial</i>      | Hs00270952_m1 |
|                     | <i>Connexin-43 (GJA1) - ventricular</i> | Hs00748445_s1 |
| Ion channels        | <i>HCN1</i>                             | Hs01085412_m1 |
|                     | <i>HCN4</i>                             | Hs00175760_m1 |
|                     | <i>KCNQ1</i>                            | Hs00923522_m1 |
|                     | <i>KCNH2</i>                            | Hs04234270_g1 |
|                     | <i>KCNJ2</i>                            | Hs00265315_m1 |
|                     | <i>RYR2</i>                             | Hs00892842_m1 |
|                     | <i>SCN5A</i>                            | Hs00165693_m1 |
|                     | <i>CACNA1C</i>                          | Hs00167681_m1 |
|                     | <i>CACNA1H</i>                          | Hs00234934_m1 |
| Adrenoreceptors     | <i>ADRA1A</i>                           | Hs00169124_m1 |
|                     | <i>ADRA1B</i>                           | Hs00171263_m1 |
|                     | <i>ADRA1D</i>                           | Hs00169865_m1 |
|                     | <i>ADRB1</i>                            | Hs00265096_m1 |
|                     | <i>ADRB2</i>                            | Hs00240532_s1 |
